# Supplementary material for: Palladium-catalyzed ortho-acylation of 2-benzyl-1,2,3-triazoles with aldehydes
Source: Royal Society of Chemistry journal article supplement (doi:10.1039/c4ob01406e), 2014-08-13

## Supporting Information

### Palladium-catalyzed *ortho*-Acylation of 2-Benzyl-1,2,3-Triazoles with Aldehydes

Qingshan Tian, Ping He, Chunxiang Kuang\*

Department of Chemistry, Tongji University, Siping Road 1239, Shanghai 200092, P. R. China, and Key Laboratory of Yangtze River Water Environment, Ministry of Education, Siping Road 1239, Shanghai 200092, P. R. China. E-mail: [kuangcx@tongji.edu.cn](mailto:kuangcx@tongji.edu.cn).

#### Table of Contents

|                                                                                                         |     |
|---------------------------------------------------------------------------------------------------------|-----|
| General Experimental Details.....                                                                       | S1  |
| General Procedure for preparation of substrats.....                                                     | S2  |
| General Procedure for the palladium-catalyzed acylation of 2-benzyl-1,2,3-triazoles with aldehydes..... | S2  |
| The data of characterization.....                                                                       | S2  |
| Reference.....                                                                                          | S10 |
| NMR Spectra of pompounds .....                                                                          | S11 |

#### General Experimental Details:

All manipulations were carried out under argon using standard Schlenk techniques. All glassware was oven or flame dried immediately prior to use. All solvents were purified and dried according to standard methods prior to use, unless stated otherwise. All reagents were obtained from commercial sources and used without further purification. Thin-layer chromatography (TLC) was performed using 60 mesh silica gel plates visualized with short-wavelength UV light (254 nm). Silica gel 60 (230 - 400 mesh) was used for column chromatography. <sup>1</sup>H NMR spectra were obtained at 400 MHz and recorded relative to the tetramethylsilane signal (0 ppm) or residual protio-solvent. <sup>13</sup>C NMR spectra were obtained at 100 MHz, and chemical shifts were recorded relative to the solvent resonance (CDCl<sub>3</sub>, 77.0 ppm). Data for <sup>1</sup>H NMR are recorded as follows: chemical shift (δ, ppm), multiplicity (s = singlet, d = doublet, t = triplet, q = quartet, m = multiplet or unresolved, br = broad singlet, coupling constant(s) in Hz, integration). Data for <sup>13</sup>C NMR are reported in terms of chemical shift (δ, ppm). IR spectra were recorded on a Nicolet FT-IR spectrometer and only major peaks are reported in cm<sup>-1</sup>. High resolution mass spectra were obtained using an Agilent 6210 Series TOF LC-MS equipped with electrospray ionization (ESI) probe operating in positive ion mode. Melting points were measured with SGW-4 micro melting point apparatus without further correction. Arylsulfonylhydrazides 2 were prepared from arylsulfonyl chlorides.

### General Procedure for preparation of substrats

All of compounds in Table 2 and Table 3 were synthesized according to the literature, and the NMR spectroscopy were consisted with those data.<sup>1,2</sup>

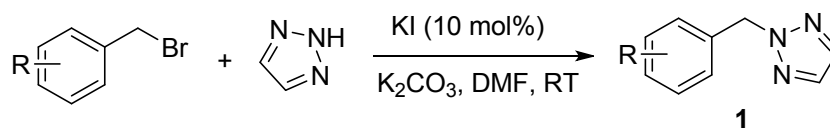

### General Procedure for the palladium-catalyzed acylation of 2-benzyl-1,2,3-triazoles with aldehydes.

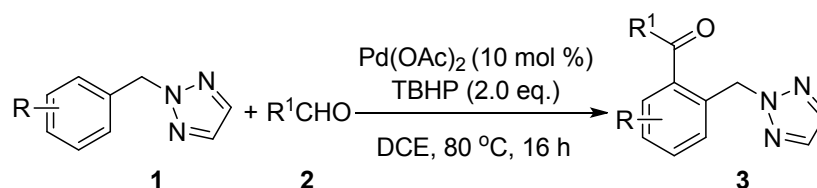

An oven-dried 15 mL screw-capped vial containing **1** (0.2 mmol, 1.0 equiv), **2** (0.4 mmol, 2.0 equiv), Pd(OAc)<sub>2</sub> (0.02 mmol, 0.1 equiv) and TBHP (0.4 mmol, 2.0 equiv) in DCE (2 mL) were evacuated and purged with Ar three times. The reaction mixture was stirred at 80 °C for 16 h. After cooling to room temperature, the solvent was evaporated and then the residue was purified on a silica gel column using petroleum ether /ethyl acetate (6/1) as eluent to give the desired products.

### The data of characterization

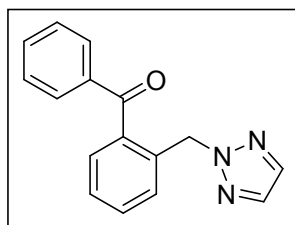

#### (2-((2H-1,2,3-triazol-2-yl)methyl)phenyl)(phenyl)methanone (**3a**)

Colorless oil; <sup>1</sup>H NMR (400 MHz, CDCl<sub>3</sub>) δ 7.81-7.79 (m, 2H), 7.63-7.57 (m, 3H), 7.48-7.44 (m, 4H), 7.38 (d, J = 7.3 Hz, 1H), 7.11 (d, J = 7.7 Hz, 1H), 5.88 (s, 2H); <sup>13</sup>C NMR (100 MHz, CDCl<sub>3</sub>) δ 197.45, 134.47, 133.73, 133.20, 131.15, 130.39, 130.21, 129.82, 129.19, 128.42, 127.38, 55.85; IR: <sub>max</sub>(thin film) (cm<sup>-1</sup>)= 3060, 2920, 2856, 1690, 1663, 1618, 1596, 1469, 1448, 1415, 1315, 1247, 1176, 1021, 962, 934, 766, 698, 611; HRMS (ESI-TOF) m/z: calcd for C<sub>16</sub>H<sub>13</sub>N<sub>3</sub>NaO<sup>+</sup>:286.0956 (M+Na)<sup>+</sup>, found: 286.0961.

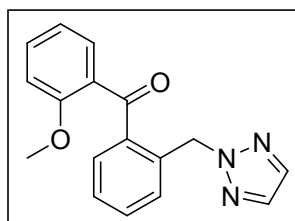

#### (2-((2H-1,2,3-triazol-2-yl)methyl)phenyl)(2-methoxyphenyl)methanone (**3b**)

White solid; m. p. 87 °C; <sup>1</sup>H NMR (400 MHz, CDCl<sub>3</sub>) δ 7.70 (s, 2H), 7.54-7.40 (m, 4H), 7.31 (s,

1H), 7.05 (t, *J* = 7.5 Hz, 1H), 6.99 (d, *J* = 8.4 Hz, 1H), 6.75 (d, *J* = 7.6 Hz, 1H), 6.10 (s, 2H), 3.71 (s, 3H); <sup>13</sup>C NMR (100 MHz, CDCl<sub>3</sub>) δ 194.39, 134.50, 132.89, 131.71, 131.04, 130.64, 127.95, 127.20, 120.45, 111.68, 56.44, 55.61; IR: max(thin film) (cm<sup>-1</sup>) = 3029, 2936, 2839, 1652, 1606, 1568, 1500, 1446, 1430, 1416, 1360, 1274, 1242, 1165, 1101, 947, 821, 736, 702, 622; HRMS (ESI-TOF) *m/z*: calcd for C<sub>17</sub>H<sub>15</sub>N<sub>3</sub>NaO<sub>2</sub><sup>+</sup>: 316.1062 (M+Na)<sup>+</sup>, found: 316.1063.

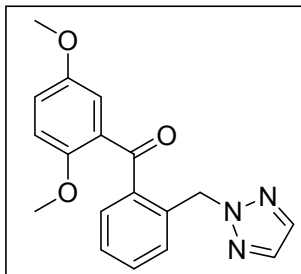

**(2-((2H-1,2,3-triazol-2-yl)methyl)phenyl)(2,5-dimethoxyphenyl)methanone (3c)**

White solid; m. p. 98 °C; <sup>1</sup>H NMR (400 MHz, CDCl<sub>3</sub>) δ 7.70 (s, 2H), 7.46-7.40 (m, 2H), 7.31-7.28 (m, 2H), 7.07-7.04 (m, 2H), 6.92 (d, *J* = 8.6 Hz, 1H), 6.76 (d, *J* = 7.7 Hz, 1H), 6.10 (s, 2H), 3.81 (s, 3H), 3.63 (s, 3H); <sup>13</sup>C NMR (100 MHz, CDCl<sub>3</sub>) δ 197.38, 153.45, 152.39, 137.49, 136.42, 134.50, 132.92, 131.76, 130.79, 127.98, 127.23, 118.85, 114.86, 113.41, 56.43, 56.31, 55.90; IR: max(thin film) (cm<sup>-1</sup>) = 3010, 2963, 2920, 2850, 1715, 1660, 1596, 1470, 1450, 1400, 1265, 1250, 1095, 1021, 962, 944, 820, 736, 620; HRMS (ESI-TOF) *m/z*: calcd for C<sub>18</sub>H<sub>17</sub>N<sub>3</sub>NaO<sub>3</sub><sup>+</sup>: 346.1168 (M+Na)<sup>+</sup>, found: 346.1170.

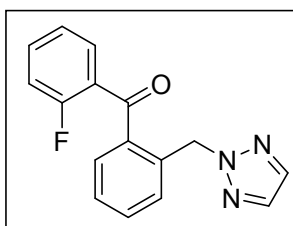

**(2-((2H-1,2,3-triazol-2-yl)methyl)phenyl)(2-fluorophenyl)methanone (3d)**

Colorless oil; <sup>1</sup>H NMR (400 MHz, CDCl<sub>3</sub>) δ 7.67-7.55 (m, 4H), 7.48 (t, *J* = 7.8 Hz, 2H), 7.36 (t, *J* = 7.5 Hz, 1H), 7.28 (m, 1H), 7.16 (m, 1H), 6.93 (d, *J* = 7.6 Hz, 1H), 6.06 (s, 2H); <sup>13</sup>C NMR (100 MHz, CDCl<sub>3</sub>) δ 194.45, 161.85 (d, *J* = 255.78 Hz), 137.05, 136.34, 134.56, 134.00 (d, *J* = 8.6 Hz), 132.24, 131.50 (d, *J* = 1.9 Hz), 130.87, 130.38, 128.81, 128.35, 127.61, 124.21 (d, *J* = 3.7 Hz), 116.64, 116.54 (d, *J* = 21.8 Hz), 56.12; IR: max(thin film) (cm<sup>-1</sup>) = 3008, 2920, 2850, 1710, 1658, 1600, 1471, 1450, 1400, 1249, 1175, 1021, 978, 760; HRMS (ESI-TOF) *m/z*: calcd for C<sub>16</sub>H<sub>12</sub>FN<sub>3</sub>NaO<sup>+</sup>: 304.0862 (M+Na)<sup>+</sup>, found: 304.0865.

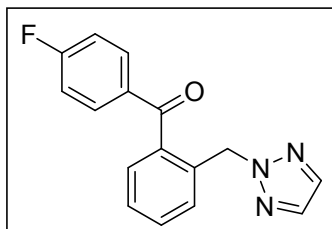

**(2-((2H-1,2,3-triazol-2-yl)methyl)phenyl)(4-fluorophenyl)methanone (3e)**

Colorless oil; <sup>1</sup>H NMR (400 MHz, CDCl<sub>3</sub>) δ 7.82 (m, 2H), 7.55 (s, 2H), 7.49 (dd, *J* = 9.9, 4.1 Hz, 1H), 7.40 (d, *J* = 2.5 Hz, 2H), 7.14 (m, 3H), 5.86 (s, 2H); <sup>13</sup>C NMR (100 MHz, CDCl<sub>3</sub>) δ 195.85, 166.88 (d, *J* = 255.78 Hz), 141.05, 137.47, 135.27, 134.45, 133.98, 133.11 (d, *J* = 9.5 Hz), 131.17,

130.09, 129.46 (d, J = 12.5 Hz), 127.47 (d, J = 9.4 Hz), 115.61, 55.74; IR:<sub>max</sub>(thin film) (cm<sup>-1</sup>)= 3020, 2919, 2844, 1766, 1650, 1601, 1474, 1455, 1398, 1252, 1021, 983, 870; HRMS (ESI-TOF) m/z: calcd for C<sub>16</sub>H<sub>12</sub>FN<sub>3</sub>NaO<sup>+</sup>:304.0862 (M+Na)<sup>+</sup>, found: 304.0865.

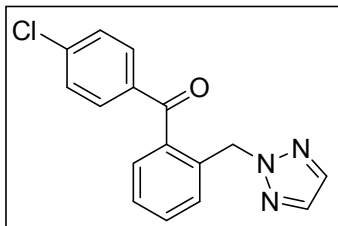

**(2-((2H-1,2,3-triazol-2-yl)methyl)phenyl)(4-chlorophenyl)methanone (3f)**

Colorless oil; <sup>1</sup>H NMR (400 MHz, CDCl<sub>3</sub>) δ 7.75-7.73 (m, 2H), 7.56 (s, 2H), 7.50 (dd, J = 5.6, 3.5 Hz, 1H), 7.44 (m, 2H), 7.41 (t, J = 3.9 Hz, 2H), 7.17 (d, J = 7.7 Hz, 1H), 5.86 (d, J = 7.6 Hz, 2H); <sup>13</sup>C NMR (100 MHz, CDCl<sub>3</sub>) δ 196.15, 139.76, 134.68, 134.25, 131.76, 131.32, 130.27, 129.56, 128.72, 127.52, 55.73; IR:<sub>max</sub>(thin film) (cm<sup>-1</sup>)= 3040, 2925, 2854, 1730, 1689, 1605, 1473, 1450, 1401, 1170, 1028, 1000, 867; HRMS (ESI-TOF) m/z: calcd for C<sub>16</sub>H<sub>12</sub>ClN<sub>3</sub>NaO<sup>+</sup>:320.0567 (M+Na)<sup>+</sup>, found: 320.0569.

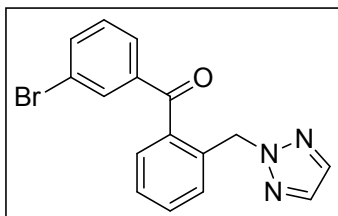

**(2-((2H-1,2,3-triazol-2-yl)methyl)phenyl)(3-bromophenyl)methanone (3g)**

Yellow oil; <sup>1</sup>H NMR (400 MHz, CDCl<sub>3</sub>) δ 7.93 (s, 1H), 7.74-7.68 (m, 3H), 7.58 (s, 2H), 7.51 (m, 1H), 7.42-7.34 (m, 2H), 7.16 (d, J = 7.7 Hz, 1H), 5.89 (s, 2H); <sup>13</sup>C NMR (100 MHz, CDCl<sub>3</sub>) δ 195.95, 139.32, 136.64, 136.02, 134.5, 133.10, 131.55, 130.07, 129.83, 129.59, 128.93, 127.60, 122.67, 55.75; IR:<sub>max</sub>(thin film) (cm<sup>-1</sup>)= 3030, 2921, 2852, 1726, 1670, 1600, 1471, 1443, 1409, 1080, 1028, 984, 810, 750; HRMS (ESI-TOF) m/z: calcd for C<sub>16</sub>H<sub>12</sub>BrN<sub>3</sub>NaO<sup>+</sup>:364.0061 (M+Na)<sup>+</sup>, found: 364.0065.

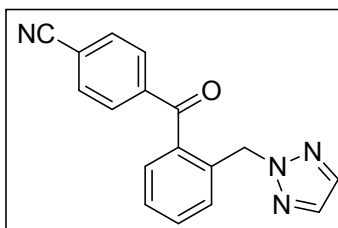

**4-(2-((2H-1,2,3-triazol-2-yl)methyl)benzoyl)benzotrile (3h)**

White solid; m. p. 110°C; <sup>1</sup>H NMR (400 MHz, CDCl<sub>3</sub>) δ 7.87 (d, J = 8.2 Hz, 2H), 7.78 (d, J = 8.3 Hz, 2H), 7.53 (m, 3H), 7.41 (m, 2H), 7.21 (d, J = 7.7 Hz, 1H), 5.90 (s, 2H); <sup>13</sup>C NMR (100 MHz, CDCl<sub>3</sub>) δ 195.88, 142.22, 140.82, 136.11, 134.52, 132.16, 131.96, 130.62, 129.92, 127.71, 117.92, 116.34, 55.67; IR:<sub>max</sub>(thin film) (cm<sup>-1</sup>)= 3030, 2920, 2851, 2228, 1715, 1690, 1600, 1472, 1450, 1401, 1028, 994, 867; HRMS (ESI-TOF) m/z: calcd for C<sub>17</sub>H<sub>12</sub>N<sub>4</sub>NaO<sup>+</sup>:311.0909 (M+Na)<sup>+</sup>, found: 311.0910.

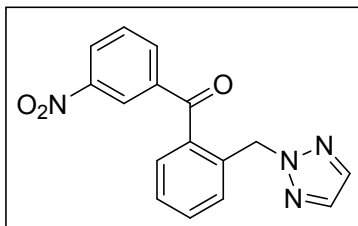

**(2-((2H-1,2,3-triazol-2-yl)methyl)phenyl)(3-nitrophenyl)methanone (3i)**

Yellow oil;  $^1\text{H}$  NMR (400 MHz,  $\text{CDCl}_3$ )  $\delta$  8.60 (s, 1H), 8.47 (d,  $J = 8.2$  Hz, 1H), 8.13 (d,  $J = 7.7$  Hz, 1H), 7.69 (t,  $J = 7.9$  Hz, 1H), 7.57 (m, 3H), 7.43 (q,  $J = 7.7$  Hz, 2H), 7.26 (m, 1H), 5.91 (s, 2H);  $^{13}\text{C}$  NMR (100 MHz,  $\text{CDCl}_3$ )  $\delta$  195.06, 148.23, 139.00, 136.34, 135.71, 134.52, 132.03, 130.17, 129.63, 127.85, 127.33, 125.04, 55.63; IR: $_{\text{max}}$ (thin film) ( $\text{cm}^{-1}$ )= 3020, 2922, 2851, 1718, 1690, 1600, 1471, 1459, 1401, 1080, 1020, 971, 800, 750; HRMS (ESI-TOF)  $m/z$ : calcd for  $\text{C}_{16}\text{H}_{12}\text{N}_4\text{NaO}^+$ :331.0807 (M+Na) $^+$ , found: 331.0810.

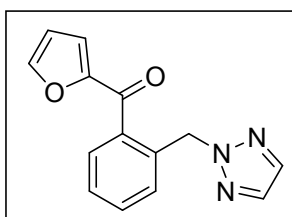

**(2-((2H-1,2,3-triazol-2-yl)methyl)phenyl)(furan-2-yl)methanone (3j)**

Yellow solid; m. p.  $103^\circ\text{C}$ ;  $^1\text{H}$  NMR (400 MHz,  $\text{CDCl}_3$ )  $\delta$  7.73 (d,  $J = 0.8$  Hz, 1H), 7.68 (d,  $J = 6.7$  Hz, 1H), 7.61 (s, 2H), 7.48 (dd,  $J = 7.5, 6.5$  Hz, 1H), 7.42 (t,  $J = 7.3$  Hz, 1H), 7.08 (d,  $J = 3.4$  Hz, 1H), 7.01 (d,  $J = 7.6$  Hz, 1H), 6.59 (dd,  $J = 3.5, 1.6$  Hz, 1H), 5.90 (s, 2H);  $^{13}\text{C}$  NMR (100 MHz,  $\text{CDCl}_3$ )  $\delta$  183.64, 152.44, 147.81, 136.40, 135.61, 134.51, 131.47, 129.22, 128.88, 127.47, 121.65, 112.36, 55.63; IR: $_{\text{max}}$ (thin film) ( $\text{cm}^{-1}$ )= 3018, 2925, 2850, 1718, 1690, 1600, 1558, 1530, 1471, 1500, 1400, 1080, 1020, 983, 806, 751; HRMS (ESI-TOF)  $m/z$ : calcd for  $\text{C}_{14}\text{H}_{11}\text{N}_3\text{NaO}_2^+$ :276.0749 (M+Na) $^+$ , found: 276.0751.

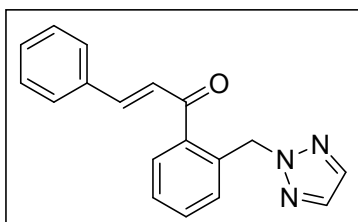

**(E)-1-(2-((2H-1,2,3-triazol-2-yl)methyl)phenyl)-3-phenylprop-2-en-1-one (3k)**

Yellow oil;  $^1\text{H}$  NMR (400 MHz,  $\text{CDCl}_3$ )  $\delta$  7.80 (d,  $J = 7.3$  Hz, 2H), 7.60 (m, 3H), 7.46 (m, 4H), 7.40 (d,  $J = 7.2$  Hz, 1H), 7.10 (d,  $J = 7.7$  Hz, 1H), 5.89 (s, 2H);  $^{13}\text{C}$  NMR (100 MHz,  $\text{CDCl}_3$ )  $\delta$  150.77, 135.53, 134.46, 133.78, 132.16, 130.09, 129.17, 128.35, 127.37, 55.85; IR: $_{\text{max}}$ (thin film) ( $\text{cm}^{-1}$ )= 3023, 2918, 2846, 1675, 1608, 1500, 1471, 1450, 1001, 979, 761; HRMS (ESI-TOF)  $m/z$ : calcd for  $\text{C}_{18}\text{H}_{15}\text{N}_3\text{NaO}^+$ :312.1113 (M+Na) $^+$ , found: 312.1114.

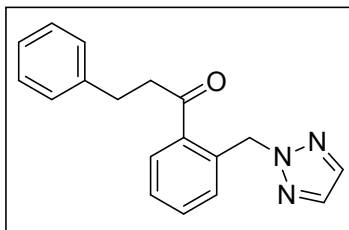

**1-(2-((2H-1,2,3-triazol-2-yl)methyl)phenyl)-3-phenylpropan-1-one (3l)**

Yellow solid; m. p. 89 °C; <sup>1</sup>H NMR (400 MHz, CDCl<sub>3</sub>) δ 7.78 (d, *J* = 7.4 Hz, 1H), 7.69 (s, 2H), 7.39-7.24 (m, 9H), 6.73 (d, *J* = 7.4 Hz, 1H), 6.01 (s, 2H), 3.31 (t, *J* = 7.7 Hz, 2H), 3.07 (t, *J* = 7.6 Hz, 2H); <sup>13</sup>C NMR (100 MHz, CDCl<sub>3</sub>) δ 202.50, 141.04, 136.23, 134.53, 132.14, 128.84, 128.58, 128.41, 127.86, 126.20; IR: <sub>max</sub>(thin film) (cm<sup>-1</sup>) = 3025, 2920, 2849, 1718, 1600, 1550, 1470, 1448, 983, 770; HRMS (ESI-TOF) *m/z*: calcd for C<sub>18</sub>H<sub>17</sub>N<sub>3</sub>NaO<sup>+</sup>: 314.1269 (M+Na)<sup>+</sup>, found: 314.1273.

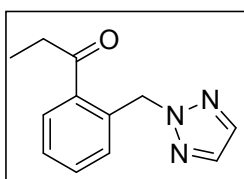

**1-(2-((2H-1,2,3-triazol-2-yl)methyl)phenyl)propan-1-one (3m)**

White solid; m. p. 93 °C; <sup>1</sup>H NMR (400 MHz, CDCl<sub>3</sub>) δ 7.81 (m, 1H), 7.68 (s, 2H), 7.41 (m, 2H), 6.73 (m, 1H), 6.01 (s, 2H), 3.01 (q, *J* = 7.2 Hz, 2H), 1.22 (t, *J* = 7.2 Hz, 3H); <sup>13</sup>C NMR (100 MHz, CDCl<sub>3</sub>) δ 204.11, 136.62, 136.10, 134.50, 131.95, 128.77, 127.82, 56.61, 34.15, 8.28; IR: <sub>max</sub>(thin film) (cm<sup>-1</sup>) = 3024, 2960, 2870, 1715, 1608, 1500, 1471, 1457, 1379, 890; HRMS (ESI-TOF) *m/z*: calcd for C<sub>12</sub>H<sub>13</sub>N<sub>3</sub>NaO<sup>+</sup>: 238.0956 (M+Na)<sup>+</sup>, found: 238.0961.

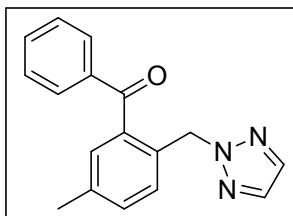

**2-((2H-1,2,3-triazol-2-yl)methyl)-5-methylphenyl(phenyl)methanone (4a)**

Yellow oil; <sup>1</sup>H NMR (400 MHz, CDCl<sub>3</sub>) δ 7.79 (d, *J* = 7.5 Hz, 2H), 7.60 (m, 1H), 7.55 (s, 2H), 7.47 (t, *J* = 7.7 Hz, 2H), 7.29 (d, *J* = 6.9 Hz, 1H), 7.23 (s, 1H), 7.06 (d, *J* = 7.9 Hz, 1H), 5.81 (s, 2H), 2.36 (s, 3H); <sup>13</sup>C NMR (100 MHz, CDCl<sub>3</sub>) δ 197.62, 137.56, 134.34, 133.12, 132.32, 131.75, 130.29, 129.39, 128.32, 55.61, 21.02; IR: <sub>max</sub>(thin film) (cm<sup>-1</sup>) = 3030, 2920, 2856, 1715, 1663, 1618, 1596, 1469, 1448, 1401, 1247, 1176, 1021, 959, 769, 700, 610; HRMS (ESI-TOF) *m/z*: calcd for C<sub>17</sub>H<sub>15</sub>N<sub>3</sub>NaO<sup>+</sup>: 300.1113 (M+Na)<sup>+</sup>, found: 300.1116.

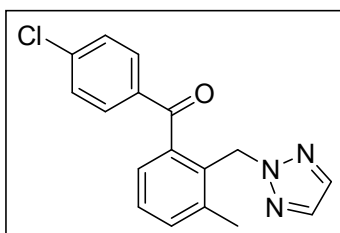

**2-((2H-1,2,3-triazol-2-yl)methyl)-3-methylphenyl(4-chlorophenyl)methanone (4b)**

Colorless oil;  $^1\text{H NMR}$  (400 MHz,  $\text{CDCl}_3$ )  $\delta$  7.73 (d,  $J = 8.5$  Hz, 2H), 7.54 (s, 2H), 7.47 (d,  $J = 8.4$  Hz, 3H), 7.37 (d,  $J = 1.9$  Hz, 1H), 7.16 (d,  $J = 8.3$  Hz, 1H), 5.78 (s, 2H);  $^{13}\text{C NMR}$  (100 MHz,  $\text{CDCl}_3$ )  $\delta$  197.64, 137.57, 134.44, 133.02, 132.32, 131.75, 130.30, 129.35, 128.32, 55.64, 28.83, 21.03; IR: max(thin film) ( $\text{cm}^{-1}$ ) = 3030, 2920, 2850, 1715, 1605, 1473, 1450, 1401, 1168, 1028, 993, 867; HRMS (ESI-TOF)  $m/z$ : calcd for  $\text{C}_{17}\text{H}_{14}\text{ClN}_3\text{NaO}^+$ : 334.0723 ( $\text{M}+\text{Na}$ ) $^+$ , found: 334.0724.

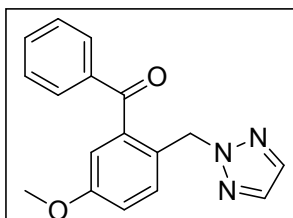

**2-((2H-1,2,3-triazol-2-yl)methyl)-5-methoxyphenyl(phenyl)methanone (4c)**

Yellow oil;  $^1\text{H NMR}$  (400 MHz,  $\text{CDCl}_3$ )  $\delta$  8.11 (d,  $J = 7.5$  Hz, 1H), 7.78 (d,  $J = 7.4$  Hz, 2H), 7.65 (s, 2H), 7.58 (m, 1H), 7.47 (m, 2H), 6.82 (dd,  $J = 8.5, 2.1$  Hz, 1H), 6.43 (d,  $J = 1.6$  Hz, 1H), 6.00 (s, 2H), 3.77 (s, 3H);  $^{13}\text{C NMR}$  (100 MHz,  $\text{CDCl}_3$ )  $\delta$  196.67, 162.07, 139.25, 138.50, 134.52, 133.27, 132.54, 130.15, 129.28, 128.23, 114.72, 111.79, 56.15, 55.33; IR: max(thin film) ( $\text{cm}^{-1}$ ) = 3035, 2924, 2850, 1712, 1652, 1606, 1568, 1500, 1446, 1430, 1416, 1360, 1274, 1265, 1242, 1165, 1091, 950, 820, 741, 622; HRMS (ESI-TOF)  $m/z$ : calcd for  $\text{C}_{17}\text{H}_{15}\text{N}_3\text{NaO}_2^+$ : 316.1062 ( $\text{M}+\text{Na}$ ) $^+$ , found: 316.1066.

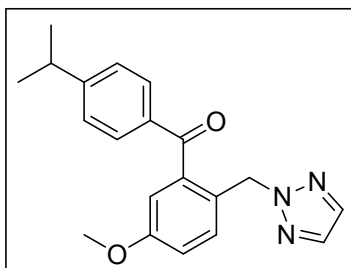

**2-((2H-1,2,3-triazol-2-yl)methyl)-5-methoxyphenyl(4-isopropylphenyl)methanone (4d)**

Yellow oil;  $^1\text{H NMR}$  (400 MHz,  $\text{CDCl}_3$ )  $\delta$  7.73 (d,  $J = 8.2$  Hz, 2H), 7.64 (s, 2H), 7.48 (d,  $J = 8.6$  Hz, 1H), 7.33 (d,  $J = 8.1$  Hz, 2H), 6.82 (dd,  $J = 8.6, 2.3$  Hz, 1H), 6.41 (d,  $J = 2.2$  Hz, 1H), 5.97 (s, 2H), 3.78 (s, 3H), 3.02-2.97 (m, 1H), 1.31 (d,  $J = 6.9$  Hz, 6H);  $^{13}\text{C NMR}$  (100 MHz,  $\text{CDCl}_3$ )  $\delta$  196.42, 161.88, 154.20, 139.08, 136.11, 134.55, 133.13, 130.53, 129.49, 126.38, 114.51, 111.71, 56.14, 55.34, 34.29, 26.95, 26.66, 23.71; IR: max(thin film) ( $\text{cm}^{-1}$ ) = 2960, 2871, 1718, 1610, 1580, 1498, 1470, 1451, 1415, 1362, 1314, 1275, 1164, 963, 820, 780; HRMS (ESI-TOF)  $m/z$ : calcd for  $\text{C}_{20}\text{H}_{21}\text{N}_3\text{NaO}_2^+$ : 358.1531 ( $\text{M}+\text{Na}$ ) $^+$ , found: 358.1534.

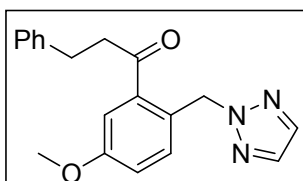

**1-(2-((2H-1,2,3-triazol-2-yl)methyl)-5-methoxyphenyl)-3-phenylpropan-1-one (4e)**

Yellow solid; m. p. 107  $^{\circ}\text{C}$ ;  $^1\text{H NMR}$  (400 MHz,  $\text{CDCl}_3$ )  $\delta$  7.84 (d,  $J = 8.7$  Hz, 1H), 7.72 (s, 2H), 7.29 (m, 6H), 6.83 (dd,  $J = 8.7, 2.4$  Hz, 1H), 6.09 (s, 2H), 3.73 (s, 3H), 3.29 (t,  $J = 7.7$  Hz, 2H), 3.07 (t,  $J = 7.7$  Hz, 2H);  $^{13}\text{C NMR}$  (100 MHz,  $\text{CDCl}_3$ )  $\delta$  200.38, 162.65, 141.26, 140.12, 134.62,

131.96, 128.43, 126.16, 114.26, 112.04, 57.13, 55.29, 42.07, 30.52; IR:<sub>max</sub>(thin film) (cm<sup>-1</sup>)= 3020, 2920, 2849, 1718, 1600, 1550, 1470, 1448, 1265, 1094, 971, 762; HRMS (ESI-TOF) m/z: calcd for C<sub>19</sub>H<sub>19</sub>N<sub>3</sub>NaO<sub>2</sub><sup>+</sup>:344.1375 (M+Na)<sup>+</sup>, found: 344.1376.

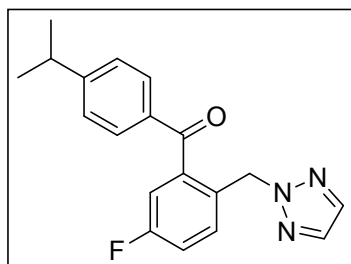

**(2-((2H-1,2,3-triazol-2-yl)methyl)-5-fluorophenyl)(phenyl)methanone (4f)**

Colorless oil; <sup>1</sup>H NMR (400 MHz, CDCl<sub>3</sub>) δ 7.74 (d, J = 8.2 Hz, 2H), 7.56 (s, 2H), 7.33 (d, J = 8.3 Hz, 2H), 7.15 (dd, J = 8.1, 5.9 Hz, 3H), 5.78 (s, 2H), 3.03-2.98 (m, 1H), 1.31 (d, J=6.9 Hz, 6H); <sup>13</sup>C NMR (100 MHz, CDCl<sub>3</sub>) δ 195.64, 162.65 (d, J = 250.48 Hz), 155.72, 155.39, 139.89 (d, J = 6.2 Hz), 134.53, 133.98 (d, J = 10.1 Hz), 131.31 (d, J = 8.0 Hz), 130.78, 130.17, 126.67, 125.75, 118.06, 117.72 (d, J = 21.3 Hz), 116.60 (d, J = 23.23 Hz), 55.10, 34.37, 23.63; IR:<sub>max</sub>(thin film) (cm<sup>-1</sup>)= 2961, 2871, 1739, 1644, 1610, 1570, 1498, 1463, 1430, 1415, 1362, 1314, 1275, 1164, 1102, 963, 820, 774; HRMS (ESI-TOF) m/z: calcd for C<sub>16</sub>H<sub>12</sub>FN<sub>3</sub>NaO<sup>+</sup>:304.0862 (M+Na)<sup>+</sup>, found: 304.0862.

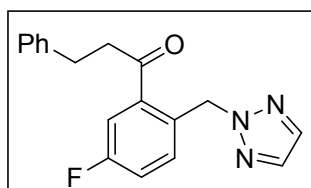

**1-(2-((2H-1,2,3-triazol-2-yl)methyl)-5-fluorophenyl)-3-phenylpropan-1-one (4g)**

Yellow oil; <sup>1</sup>H NMR (400 MHz, CDCl<sub>3</sub>) δ 7.67 (s, 2H), 7.41 (dd, J = 9.0, 2.5 Hz, 1H), 7.33 (t, J = 7.5 Hz, 2H), 7.29-7.22 (m, 4H), 7.13 (td, J = 8.3, 2.5 Hz, 1H), 6.83 (dd, J = 8.5, 5.4 Hz, 1H), 5.92 (s, 2H), 3.26 (t, J = 7.6 Hz, 2H), 3.07 (t, J = 7.6 Hz, 2H); <sup>13</sup>C NMR (100 MHz, CDCl<sub>3</sub>) δ 201.42, 163.06 (d, J=250.48 Hz), 140.72, 138.29, 134.61, 131.59, 124.22, 131.12 (d, J = 7.9 Hz), 128.63, 128.40, 126.32, 118.97 (d, J=21.21 Hz), 115.93 (d, J=21.21 Hz), 55.76, 42.79, 30.04; IR:<sub>max</sub>(thin film) (cm<sup>-1</sup>)= 3025, 2918, 2851, 1718, 1600, 1550, 1470, 1448, 1251, 970, 721; HRMS (ESI-TOF) m/z: calcd for C<sub>18</sub>H<sub>16</sub>FN<sub>3</sub>NaO<sup>+</sup>:332.1175 (M+Na)<sup>+</sup>, found: 332.1176.

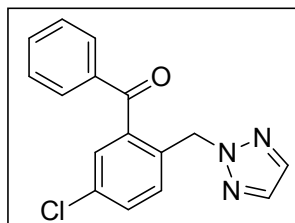

**(2-((2H-1,2,3-triazol-2-yl)methyl)-5-chlorophenyl)(phenyl)methanone (4h)**

Yellow oil; <sup>1</sup>H NMR (400 MHz, CDCl<sub>3</sub>) δ 7.79 (d, J = 7.3 Hz, 2H), 7.63 (d, J = 7.5 Hz, 1H), 7.56 (s, 2H), 7.52-7.44 (m, 3H), 7.41 (d, J = 2.0 Hz, 1H), 7.10 (d, J = 8.3 Hz, 1H), 5.80 (s, 2H); <sup>13</sup>C NMR (100 MHz, CDCl<sub>3</sub>) δ 195.95, 139.16, 136.70, 134.63, 133.70, 131.07, 130.82, 130.38, 129.42, 128.57, 55.19; IR:<sub>max</sub>(thin film) (cm<sup>-1</sup>)= 3029, 2920, 2850, 1719, 1600, 1473, 1450, 1401, 1169, 1020, 995, 872; HRMS (ESI-TOF) m/z: calcd for C<sub>12</sub>H<sub>16</sub>ClN<sub>3</sub>NaO<sup>+</sup>:320.0567 (M+Na)<sup>+</sup>,



found: 320.0566.

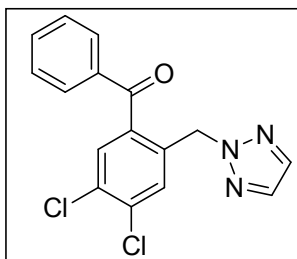

**(2-((2H-1,2,3-triazol-2-yl)methyl)-4,5-dichlorophenyl)(phenyl)methanone (4i)**

Yellow oil;  $^1\text{H NMR}$  (400 MHz,  $\text{CDCl}_3$ )  $\delta$  7.79 (d,  $J = 7.2$  Hz, 2H), 7.66 (t,  $J = 7.4$  Hz, 1H), 7.59 (s, 2H), 7.51 (m, 3H), 7.21 (s, 1H), 5.80 (s, 2H);  $^{13}\text{C NMR}$  (100 MHz,  $\text{CDCl}_3$ )  $\delta$  195.04, 137.05, 136.59, 135.53, 134.86, 133.81, 132.00, 131.36, 130.30, 128.65, 54.78; IR: max(thin film) ( $\text{cm}^{-1}$ ) = 2920, 2851, 1717, 1643, 1610, 1574, 1500, 1470, 1450, 1362, 1314, 1275, 1170, 960, 816, 754; HRMS (ESI-TOF)  $m/z$ : calcd for  $\text{C}_{16}\text{H}_{11}\text{Cl}_2\text{N}_3\text{NaO}^+$ : 354.0177 ( $\text{M}+\text{Na}$ ) $^+$ , found: 354.0178.

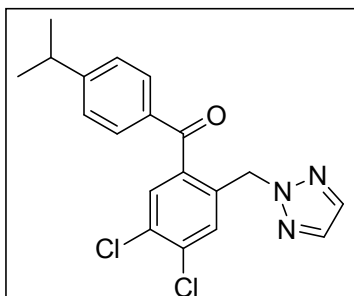

**(2-((2H-1,2,3-triazol-2-yl)methyl)-4,5-dichlorophenyl)(4-isopropylphenyl)methanone (4j)**

Yellow oil;  $^1\text{H NMR}$  (400 MHz,  $\text{CDCl}_3$ )  $\delta$  7.73 (d,  $J = 8.4$  Hz, 2H), 7.60 (s, 2H), 7.53 (s, 1H), 7.35 (d,  $J = 8.2$  Hz, 2H), 7.18 (s, 1H), 5.78 (s, 2H), 3.02 (m, 1H), 1.32 (d,  $J = 6.9$  Hz, 6H);  $^{13}\text{C NMR}$  (101 MHz,  $\text{CDCl}_3$ )  $\delta$  194.66, 155.65, 137.31, 135.36, 134.86, 134.34, 131.90, 131.19, 130.64, 130.14, 126.81, 125.88, 54.78, 34.39, 26.93, 26.65, 23.62; IR: max(thin film) ( $\text{cm}^{-1}$ ) = 2960, 2870, 1738, 1638, 1615, 1571, 1500, 1465, 1441, 1362, 1314, 1275, 1175, 1000, 965, 811, 760; HRMS (ESI-TOF)  $m/z$ : calcd for  $\text{C}_{19}\text{H}_{17}\text{Cl}_2\text{N}_3\text{NaO}^+$ : 396.0646 ( $\text{M}+\text{Na}$ ) $^+$ , found: 396.0648.

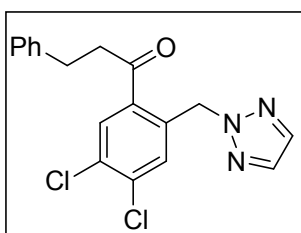

**1-(2-((2H-1,2,3-triazol-2-yl)methyl)-4,5-dichlorophenyl)-3-phenylpropan-1-one (4k)**

Yellow solid; m. p.  $99^\circ\text{C}$ ;  $^1\text{H NMR}$  (400 MHz,  $\text{CDCl}_3$ )  $\delta$  7.81 (s, 1H), 7.71 (s, 2H), 7.36-7.32 (m, 2H), 7.29-7.23 (m, 4H), 6.81 (s, 1H), 5.93 (s, 2H), 3.27 (t,  $J = 7.5$  Hz, 2H), 3.06 (t,  $J = 7.5$  Hz, 2H);  $^{13}\text{C NMR}$  (100 MHz,  $\text{CDCl}_3$ )  $\delta$  200.27, 140.53, 136.66, 136.19, 135.75, 134.93, 134.68, 132.25, 130.91, 128.66, 128.38, 126.39, 55.50, 42.69, 30.05; IR: max(thin film) ( $\text{cm}^{-1}$ ) = 3023, 2930, 2848, 1685, 1652, 1616, 1558, 1541, 1456, 1407, 1361, 1204, 990, 822, 705, 468; HRMS (ESI-TOF)  $m/z$ : calcd for  $\text{C}_{18}\text{H}_{15}\text{Cl}_2\text{N}_3\text{NaO}^+$ : 382.0490 ( $\text{M}+\text{Na}$ ) $^+$ , found: 382.0493.

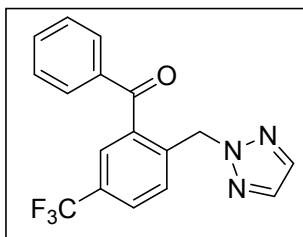

**(2-((2H-1,2,3-triazol-2-yl)methyl)-5-(trifluoromethyl)phenyl)(phenyl)methanone (4l)**

Colorless oil;  $^1\text{H}$  NMR (400 MHz,  $\text{CDCl}_3$ )  $\delta$  7.80 (d,  $J = 7.4$  Hz, 2H), 7.74 (d,  $J = 8.4$  Hz, 1H), 7.75-7.66 (m, 2H), 7.59 (s, 2H), 7.51 (t,  $J = 7.8$  Hz, 2H), 7.22 (d,  $J = 8.1$  Hz, 1H), 5.89 (s, 2H);  $^{13}\text{C}$  NMR (100 MHz,  $\text{CDCl}_3$ )  $\delta$  195.87, 139.31, 138.17, 136.55, 134.81, 133.85, 130.34, 129.71, 128.67, 127.65, 126.22, 55.41; IR: $_{\text{max}}$ (thin film) ( $\text{cm}^{-1}$ )= 3029, 2921, 2850, 1715, 1663, 1618, 1596, 1469, 1448, 1401, 1240, 1176, 959, 772, 705, 615; HRMS (ESI-TOF)  $m/z$ : calcd for  $\text{C}_{17}\text{H}_{12}\text{F}_3\text{N}_3\text{NaO}^+$ :354.0830 ( $\text{M}+\text{Na}$ ) $^+$ , found: 354.0832.

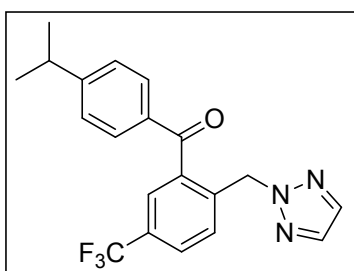

**(2-((2H-1,2,3-triazol-2-yl)methyl)-5-(trifluoromethyl)phenyl)(4-isopropylphenyl)methanone (4m)**

Colorless oil;  $^1\text{H}$  NMR (400 MHz,  $\text{CDCl}_3$ )  $\delta$  7.74 (d,  $J = 8.4$  Hz, 2H), 7.69 (d,  $J = 9.8$  Hz, 2H), 7.61 (s, 2H), 7.36 (d,  $J = 8.2$  Hz, 2H), 7.18 (d,  $J = 8.0$  Hz, 1H), 5.87 (s, 2H), 3.03 (m, 1H), 1.32 (d,  $J = 6.9$  Hz, 6H);  $^{13}\text{C}$  NMR (100 MHz,  $\text{CDCl}_3$ )  $\delta$  195.51, 155.70, 139.20, 138.44, 134.85, 134.33, 130.69, 129.49, 128.23, 127.45, 126.85, 125.93, 55.42, 34.40, 23.61; IR: $_{\text{max}}$ (thin film) ( $\text{cm}^{-1}$ )= 3021, 2960, 2870, 1718, 1638, 1571, 1500, 1471, 1451, 1362, 1275, 1175, 965, 806, 741; HRMS (ESI-TOF)  $m/z$ : calcd for  $\text{C}_{20}\text{H}_{18}\text{F}_3\text{N}_3\text{NaO}^+$ :396.1300 ( $\text{M}+\text{Na}$ ) $^+$ , found: 396.1301.

Reference:

1. J. Doiron, A. H. Soultan, R. Richard, M. M. Toure, N. Picot, R. Richard, M. C. Culf, G. A. Robichaud, M. Touaibia, *Eur. J. Med. Chem.*, 2011, **46**, 4010.
2. H. Wolfgang, B. Bettina, J. Christine, K. Michael, L. Thierry, B. Wayne, *Scientia Pharmaceutica*, 2004, 72, 197.

# NMR Spectra of compounds

<sup>1</sup>H-3a

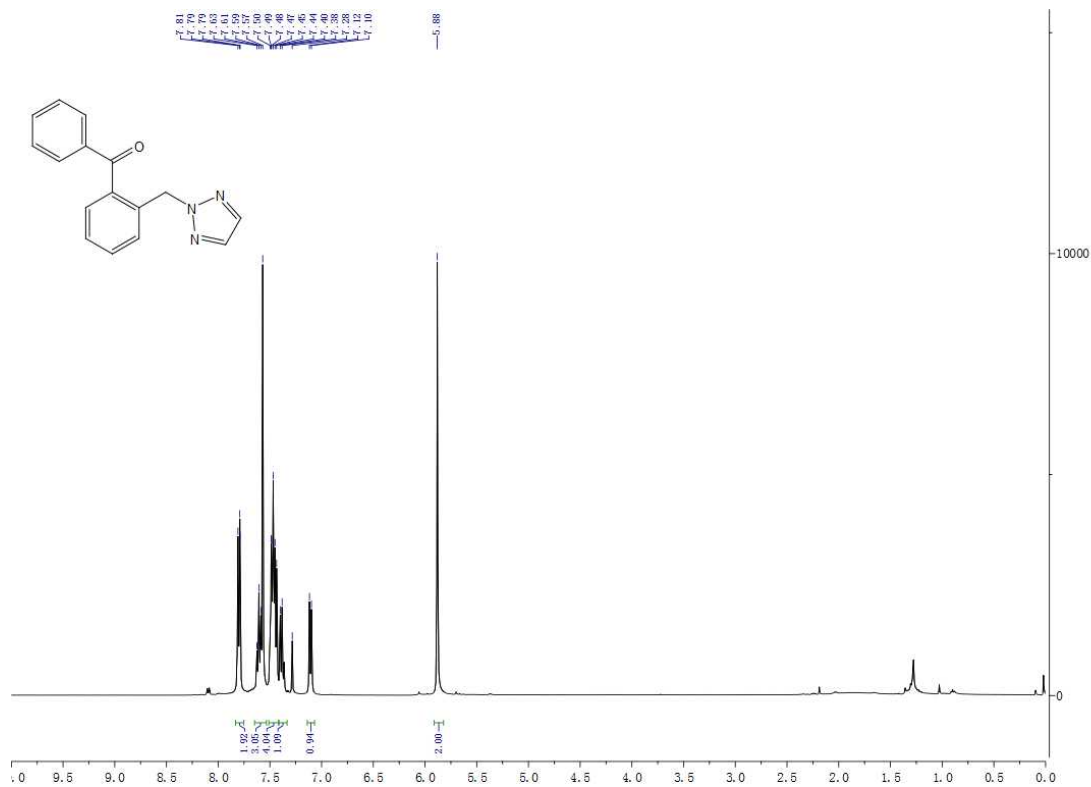

<sup>13</sup>C-3a

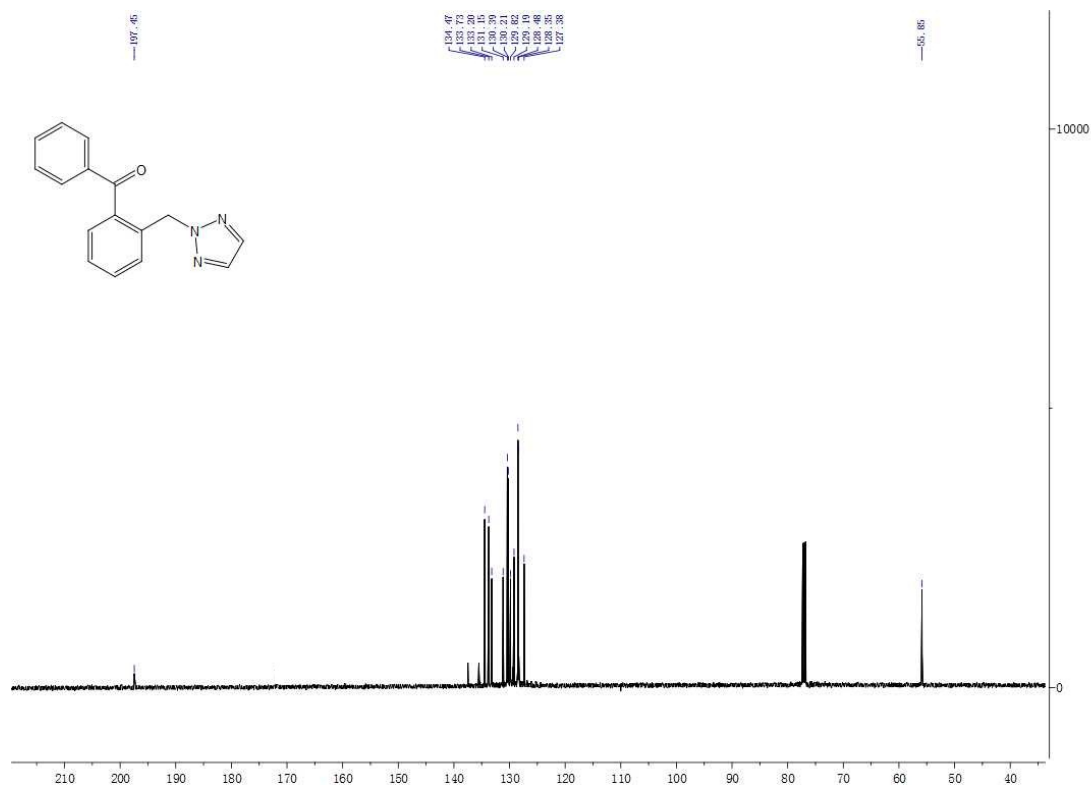

<sup>1</sup>H-3b

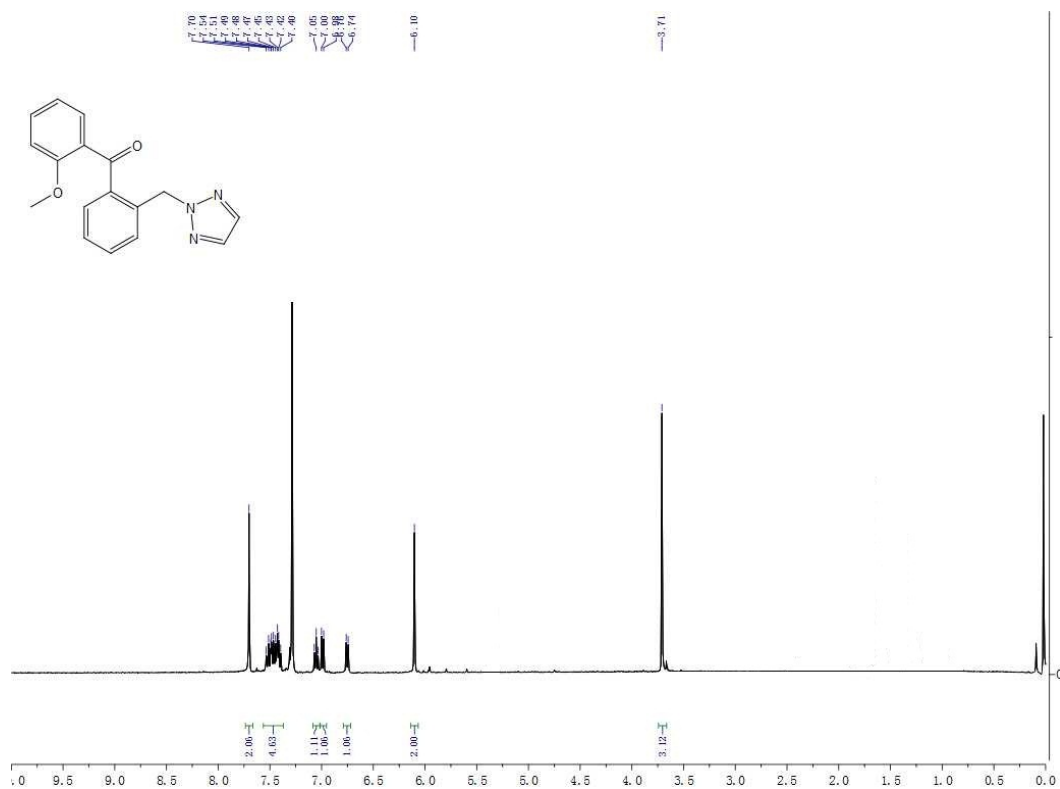

<sup>13</sup>C-3b

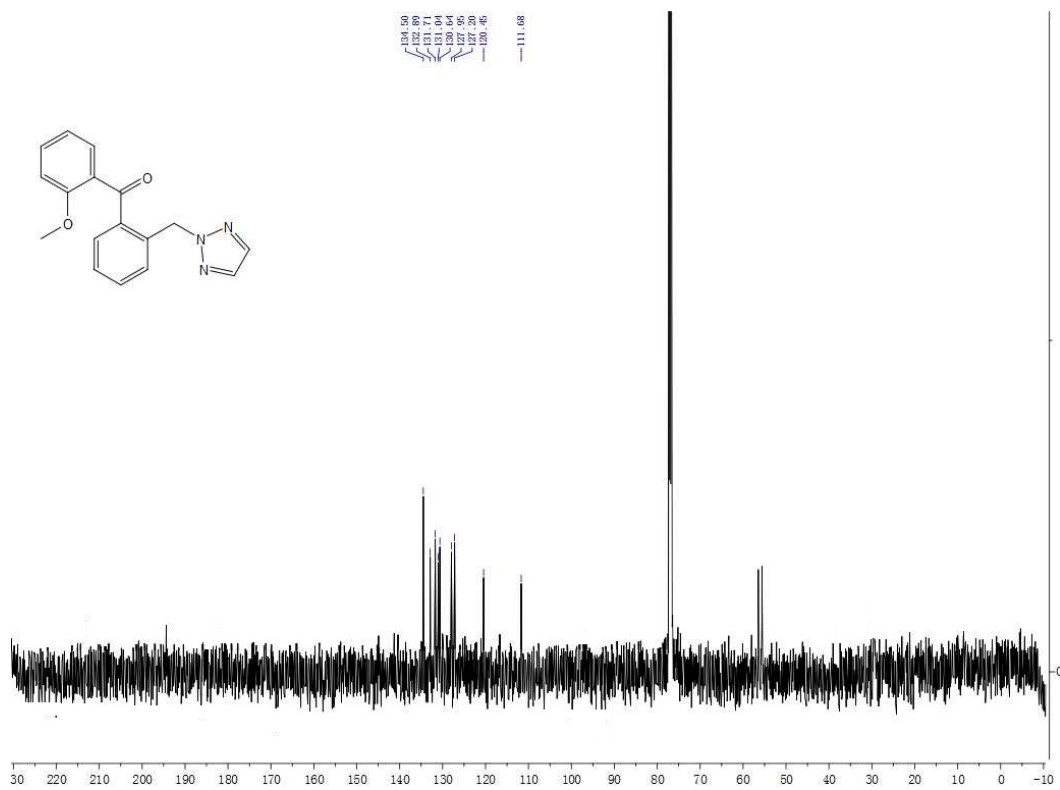

<sup>1</sup>H-3c

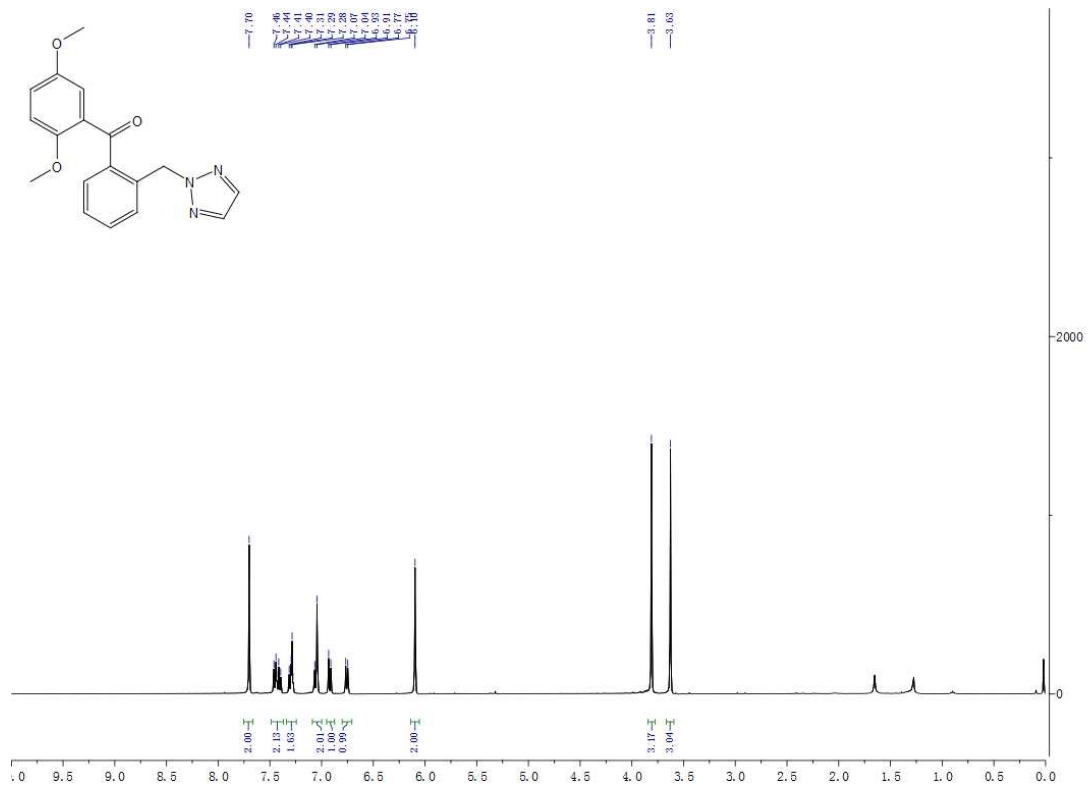

1H-3c

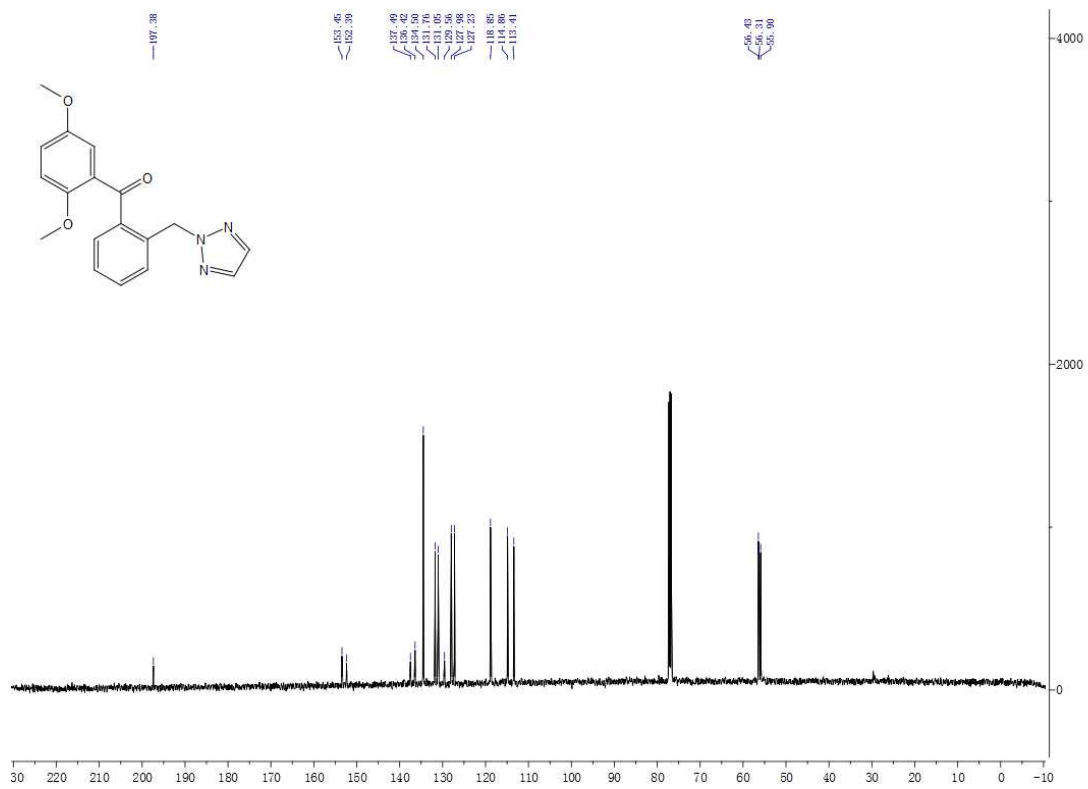

1H-3d

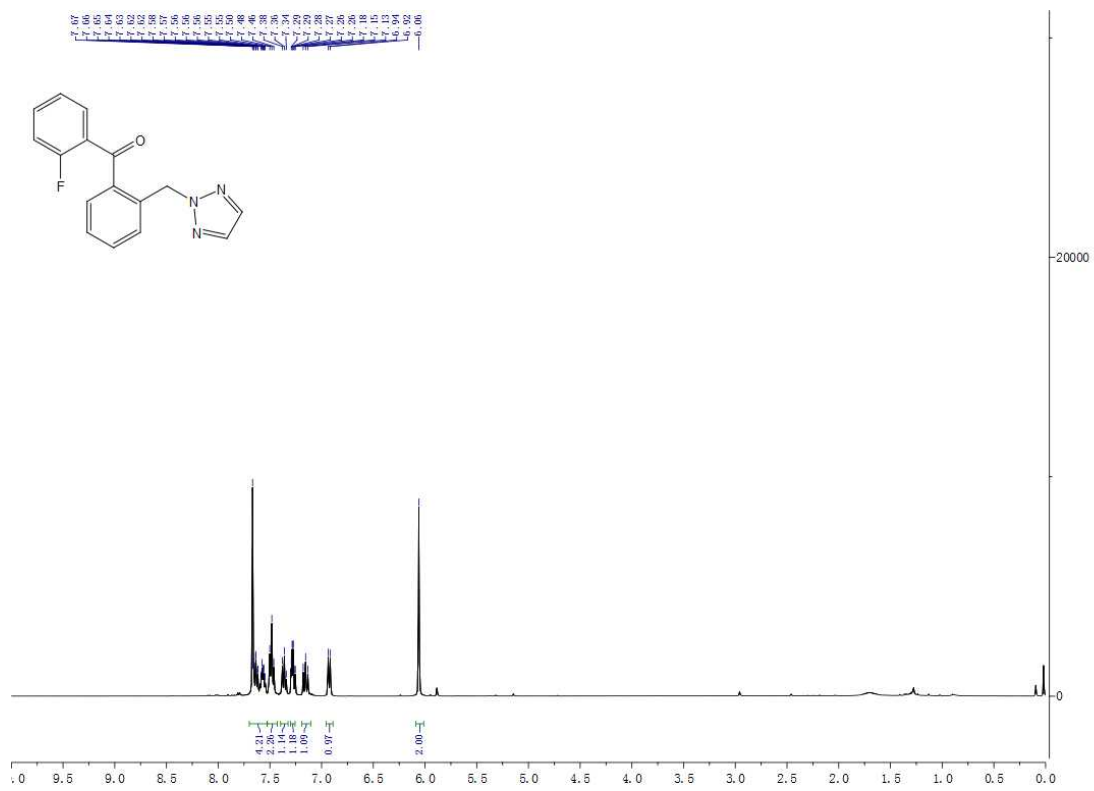

<sup>13</sup>C-3d

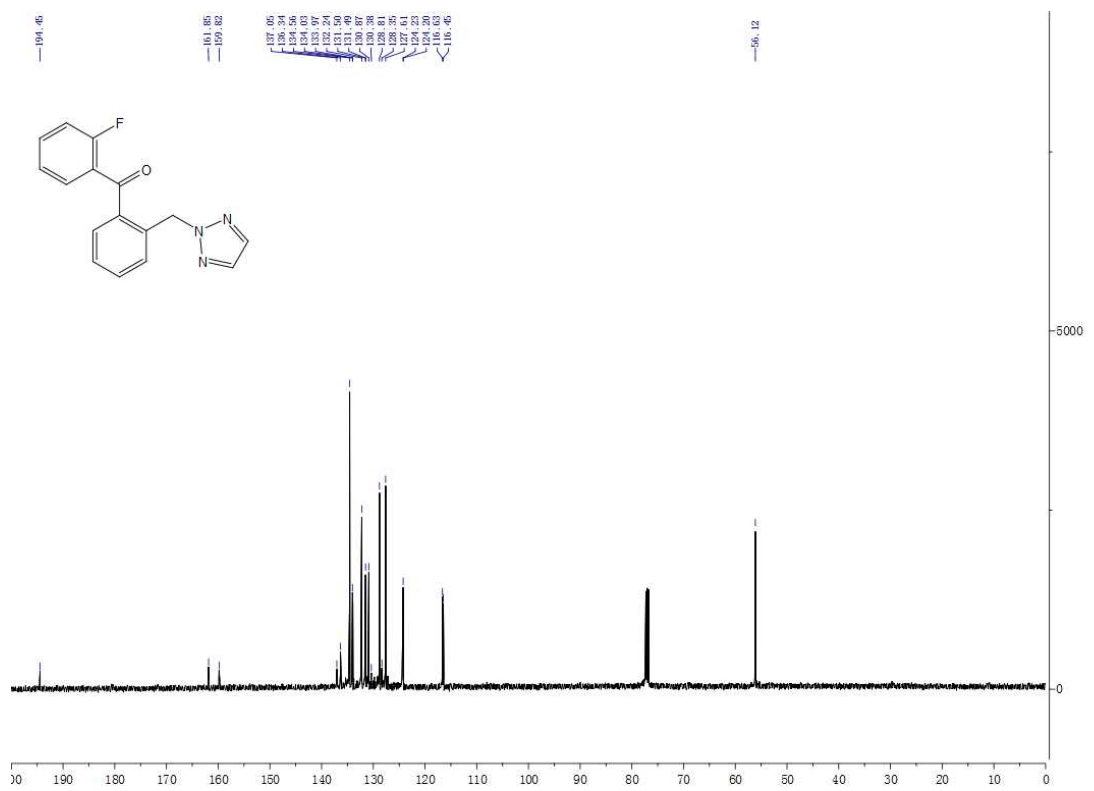

<sup>1</sup>H-3e

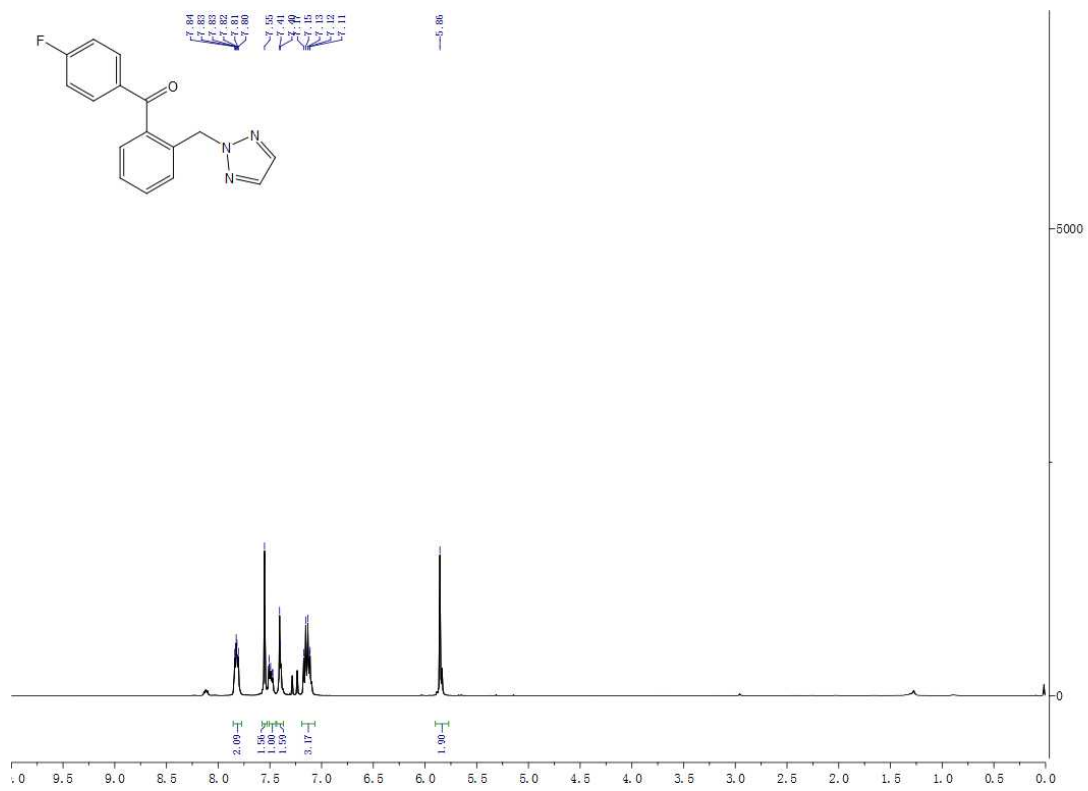

**<sup>13</sup>C-3e**

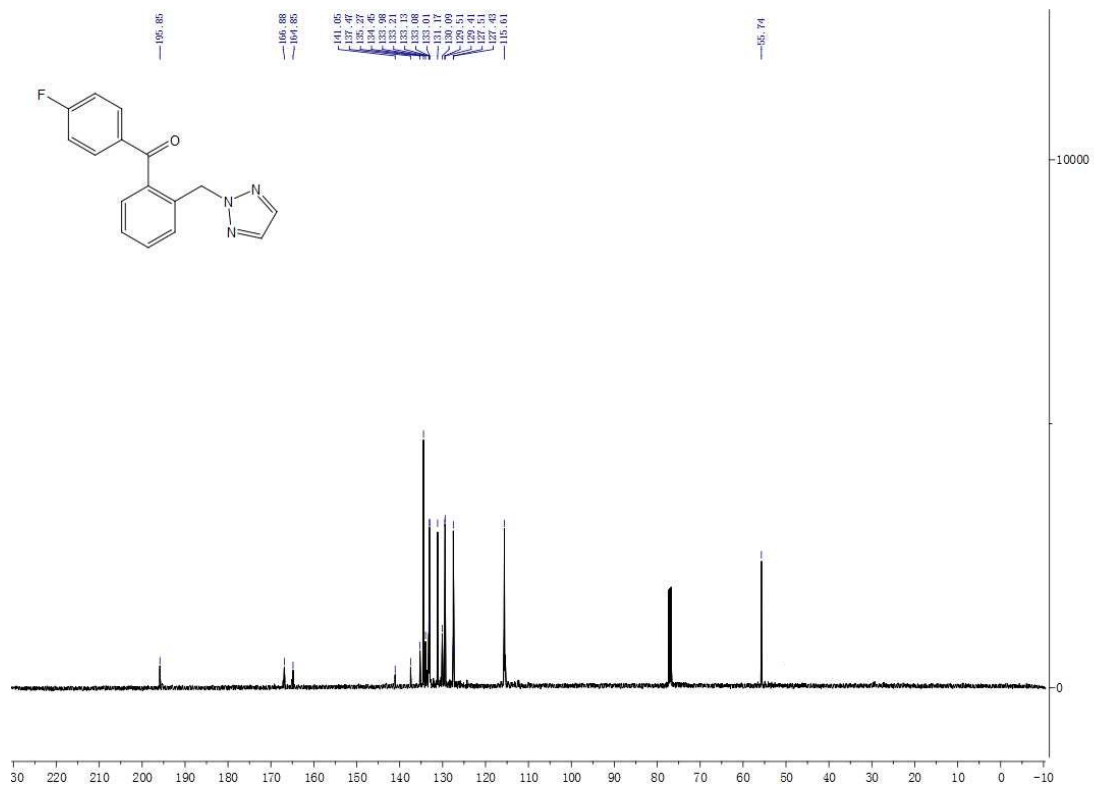

**<sup>1</sup>H-3f**

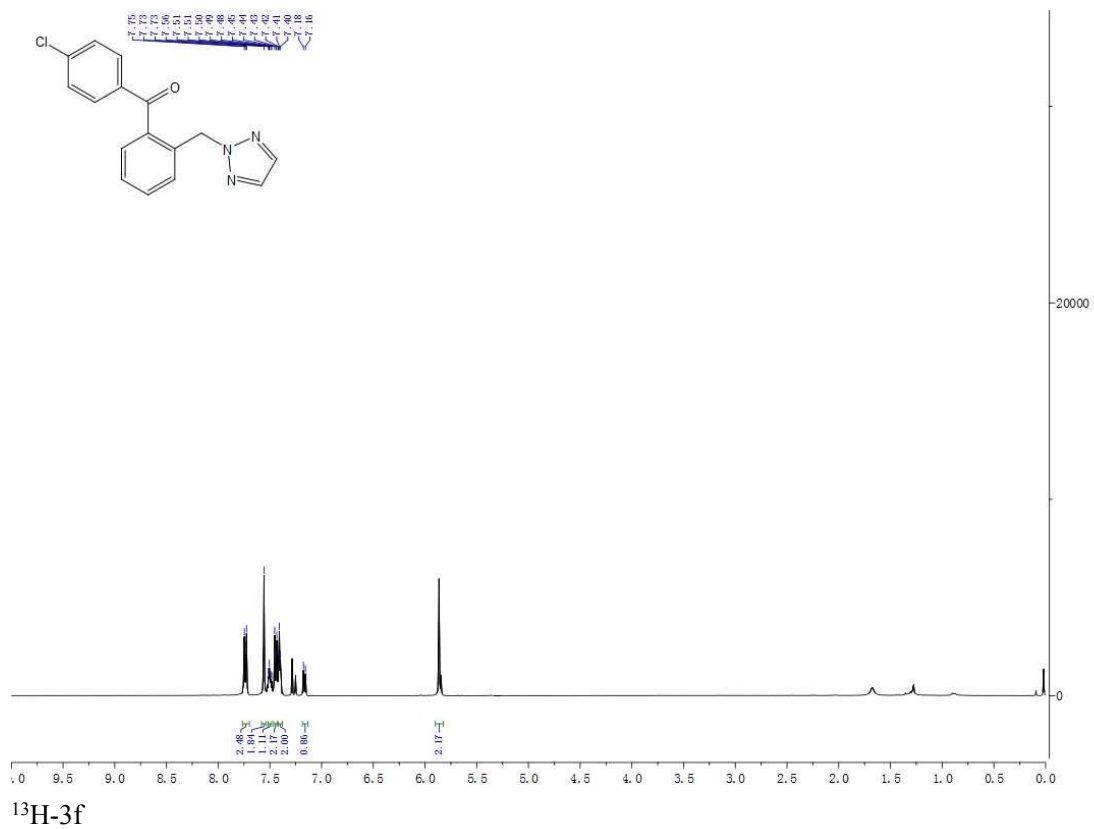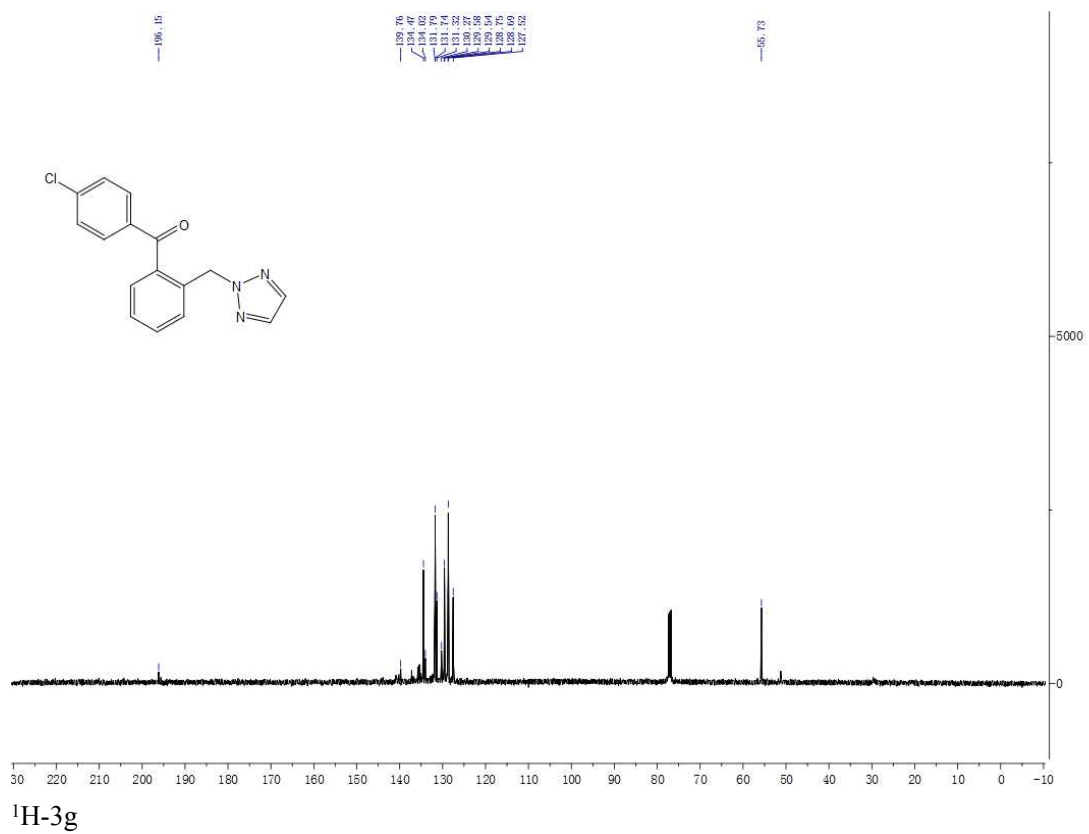





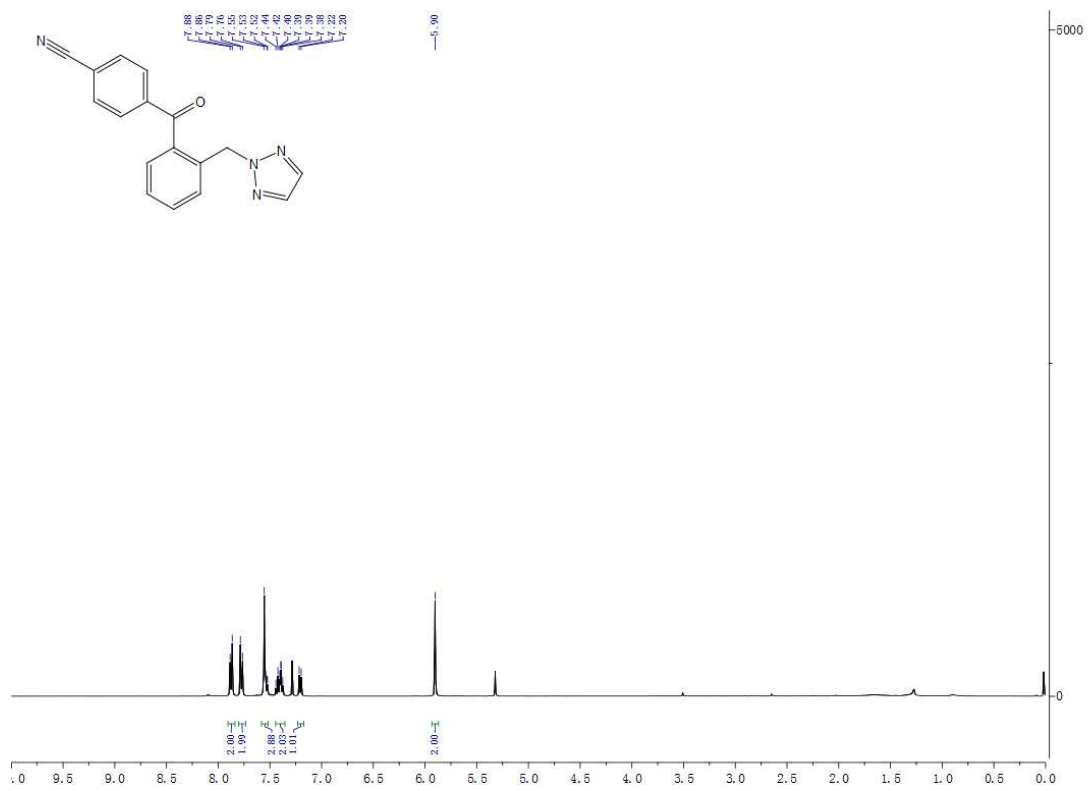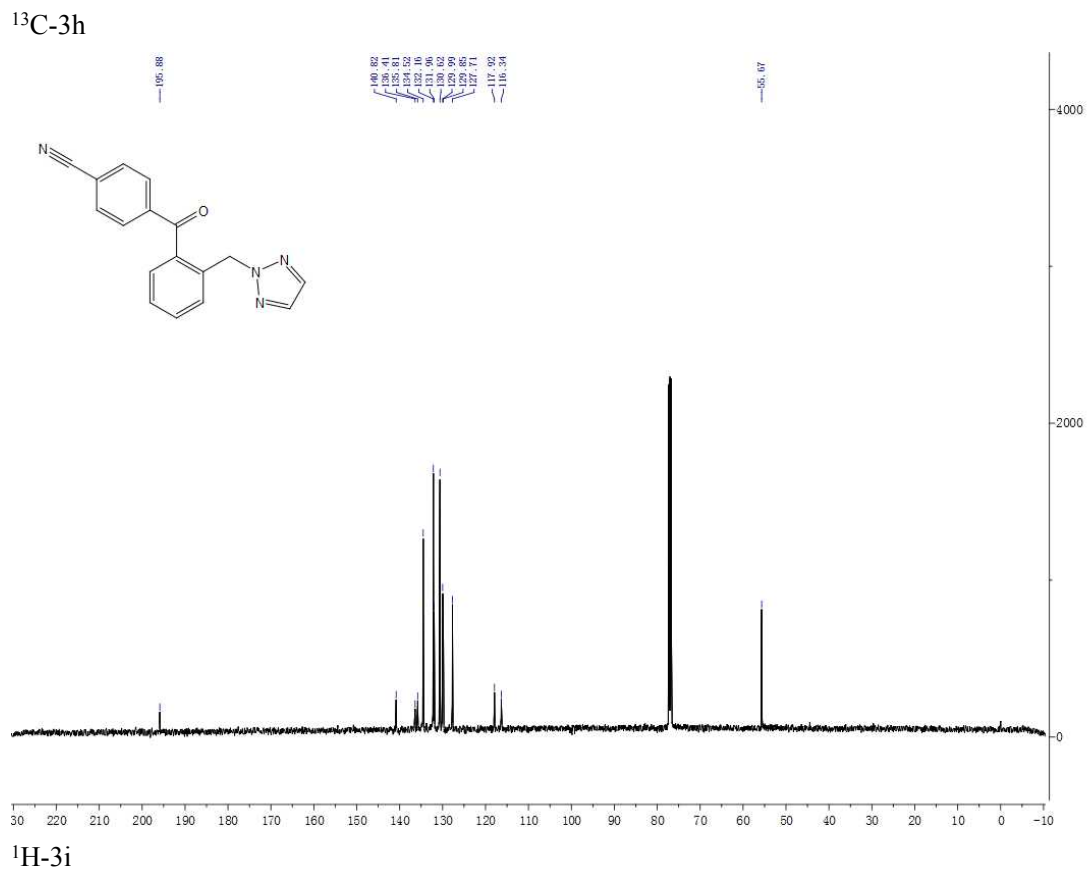

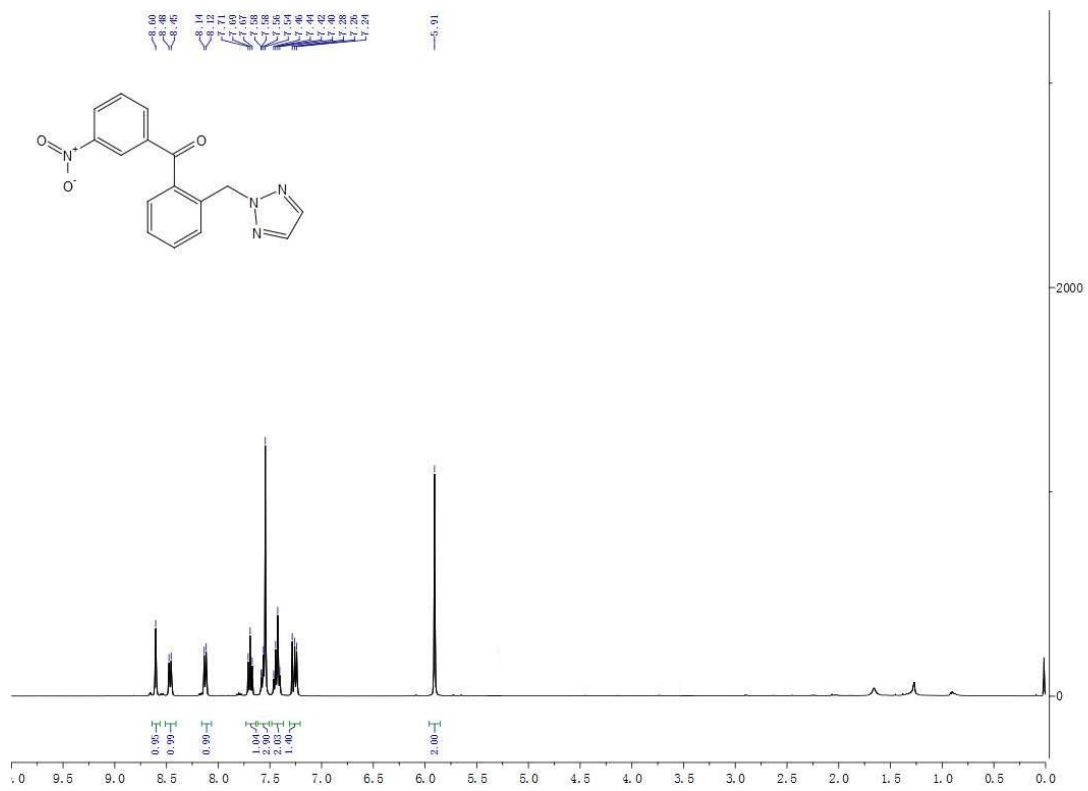

<sup>13</sup>C-3i

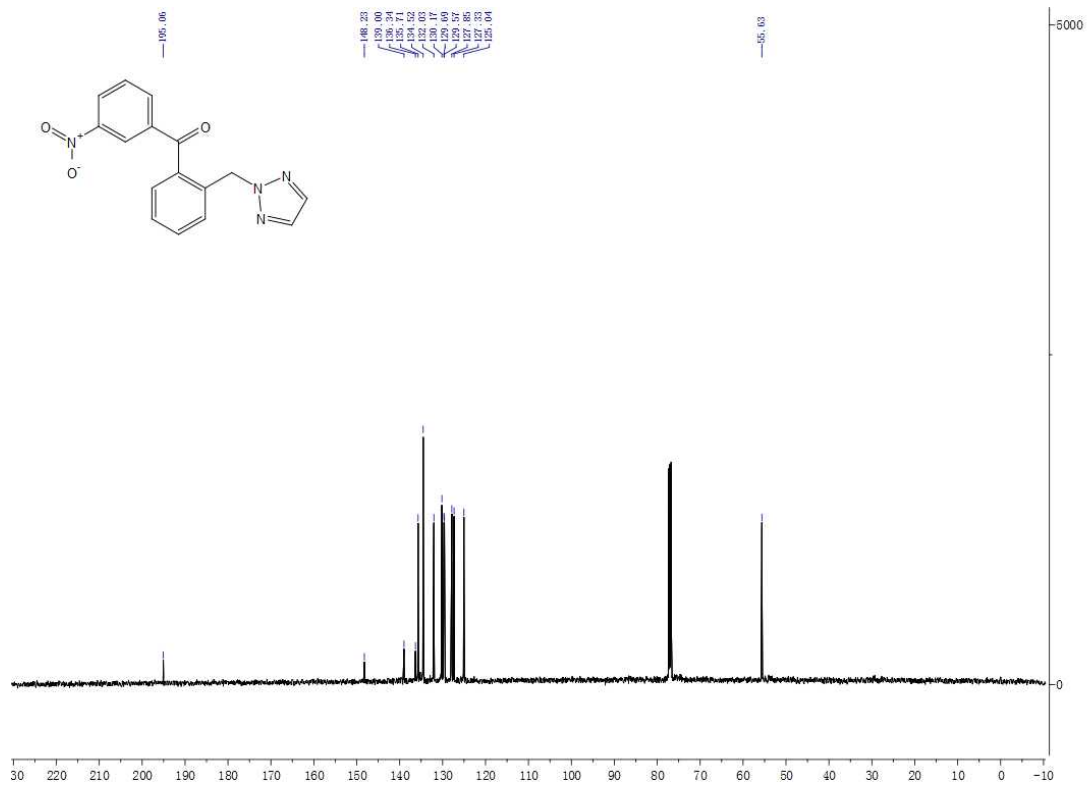

<sup>1</sup>H-3j

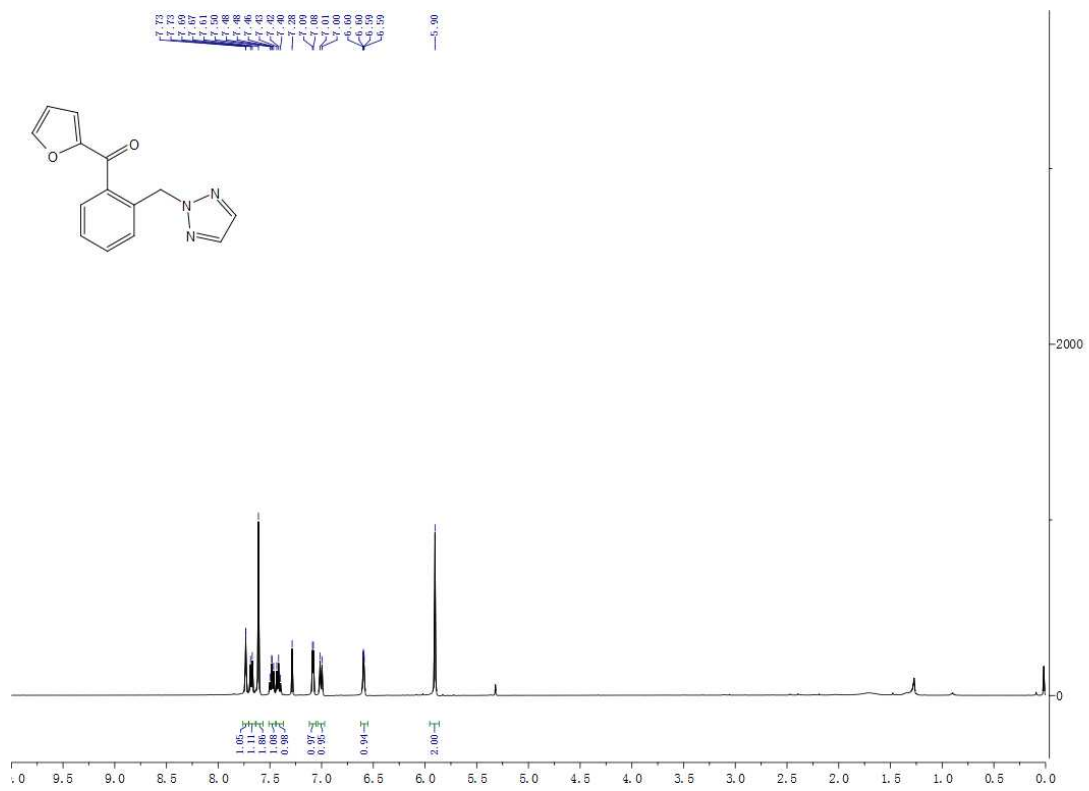

<sup>13</sup>C-3j

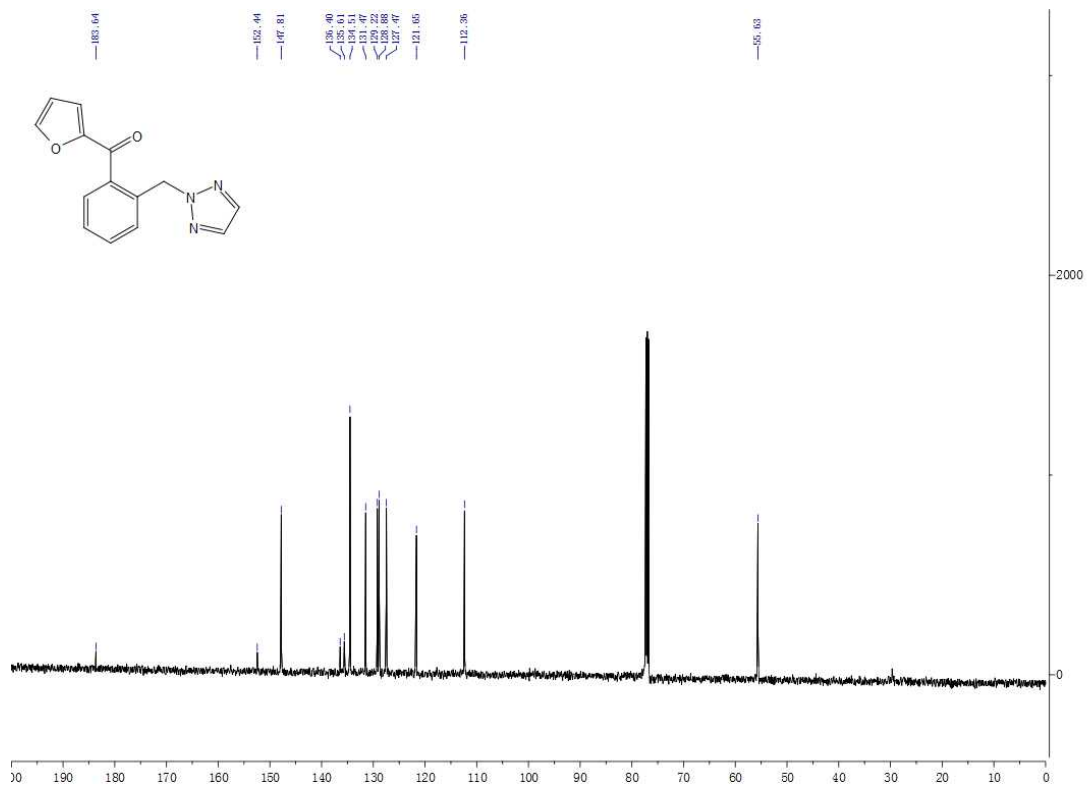

<sup>1</sup>H-3k

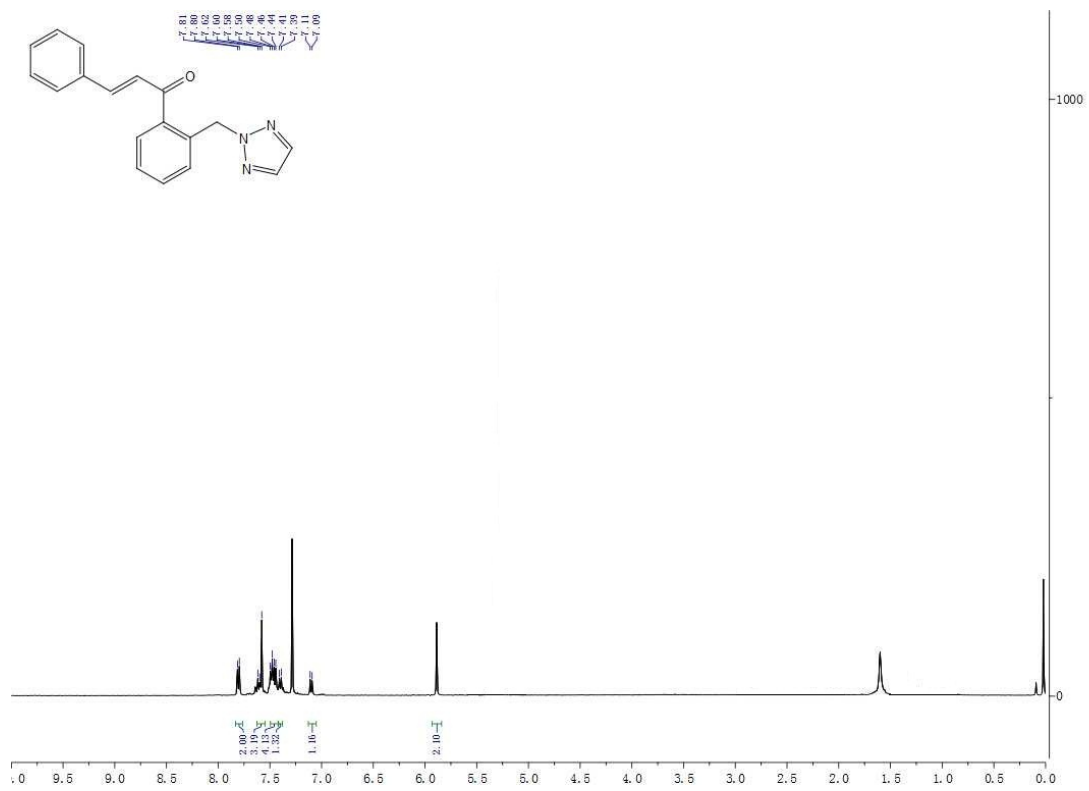

**<sup>13</sup>C-NMR**

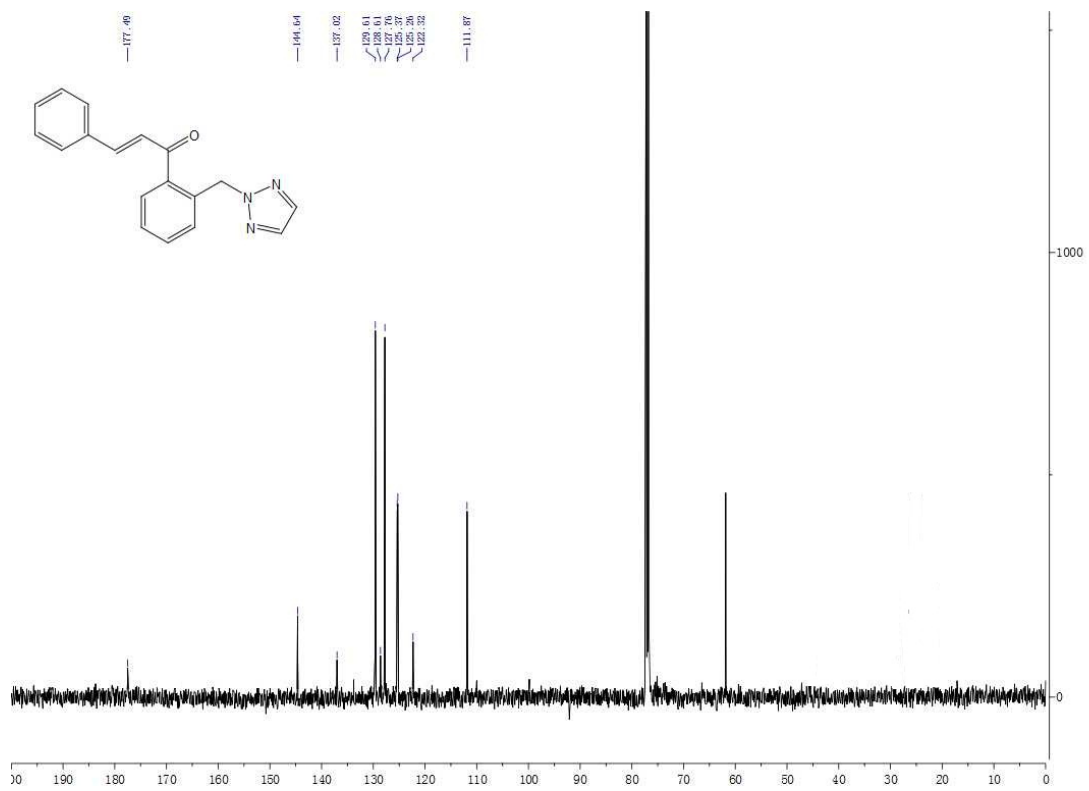

**<sup>1</sup>H-31**

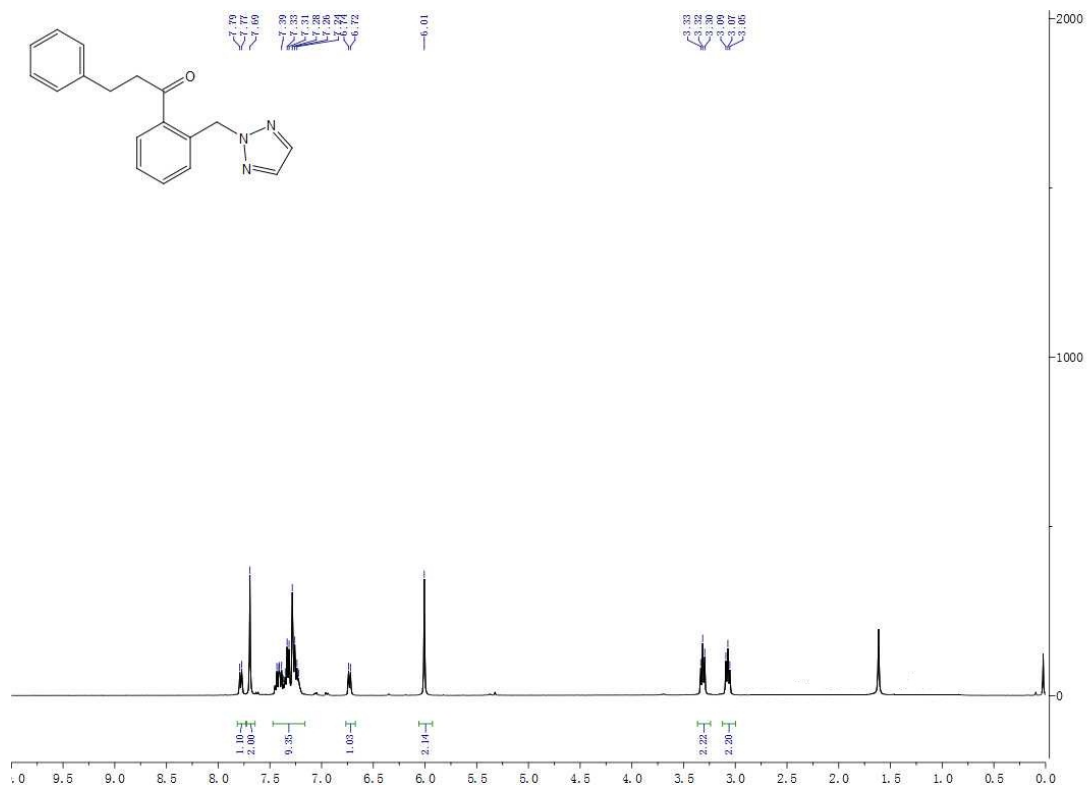

**<sup>13</sup>C-NMR**

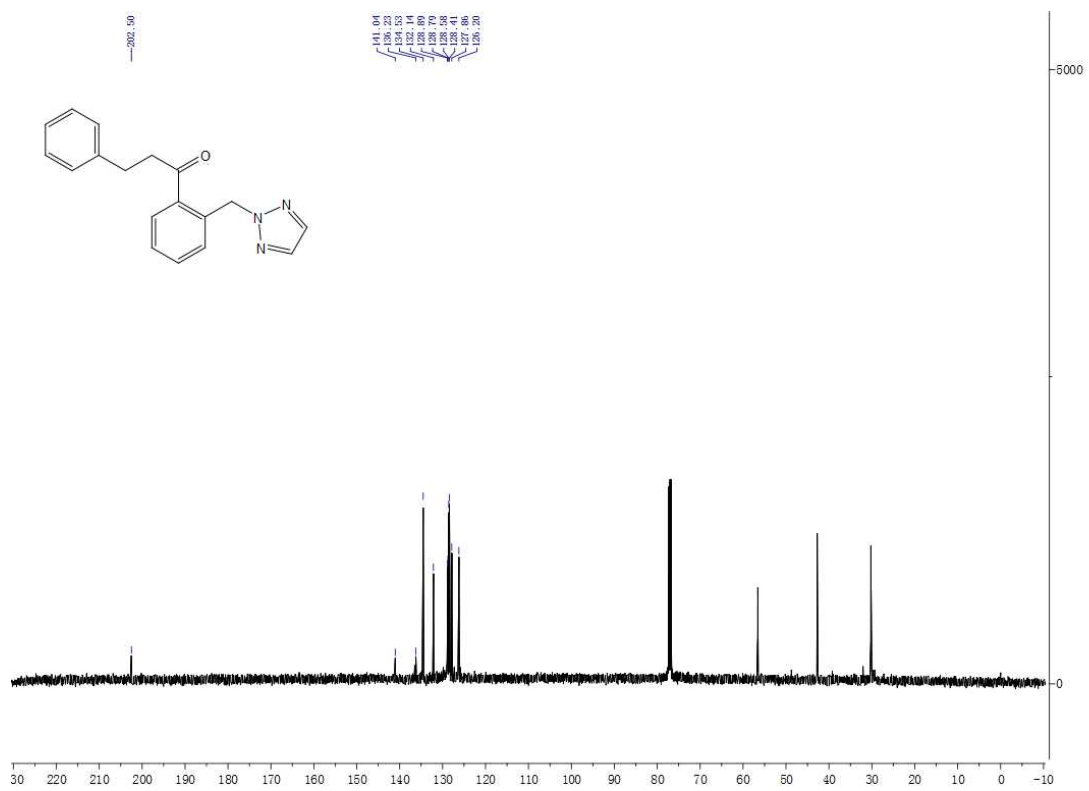

**<sup>1</sup>H-3m**

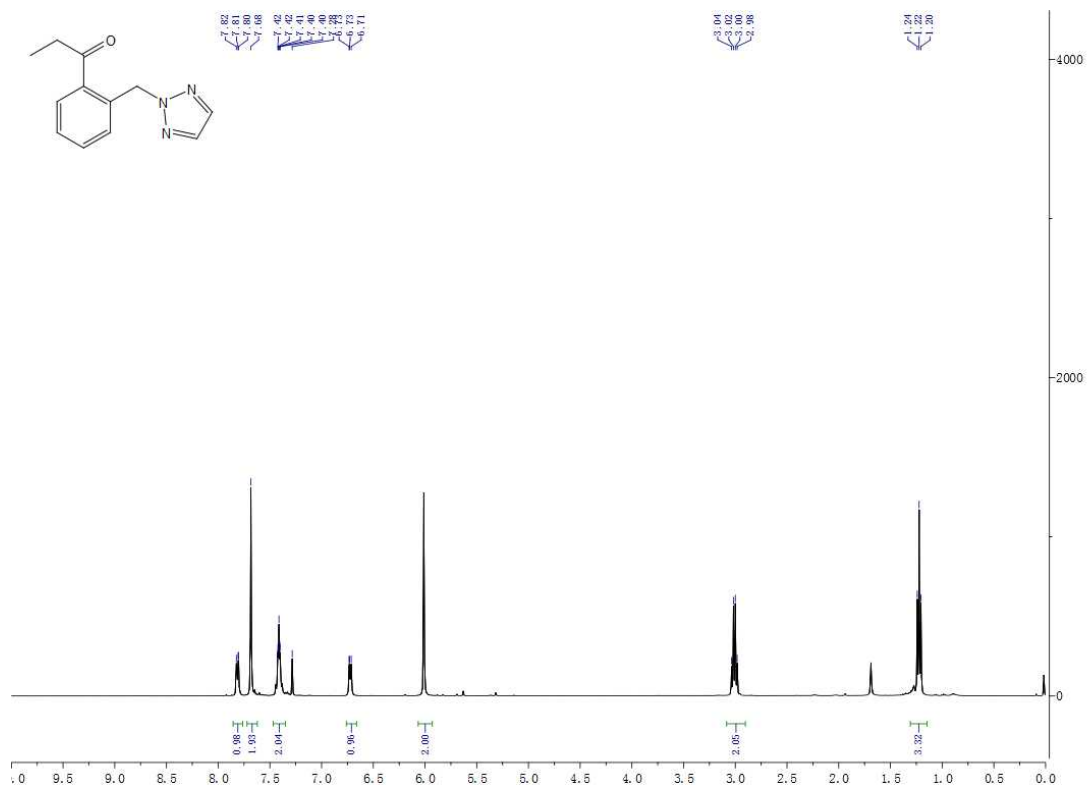

<sup>13</sup>C-3m

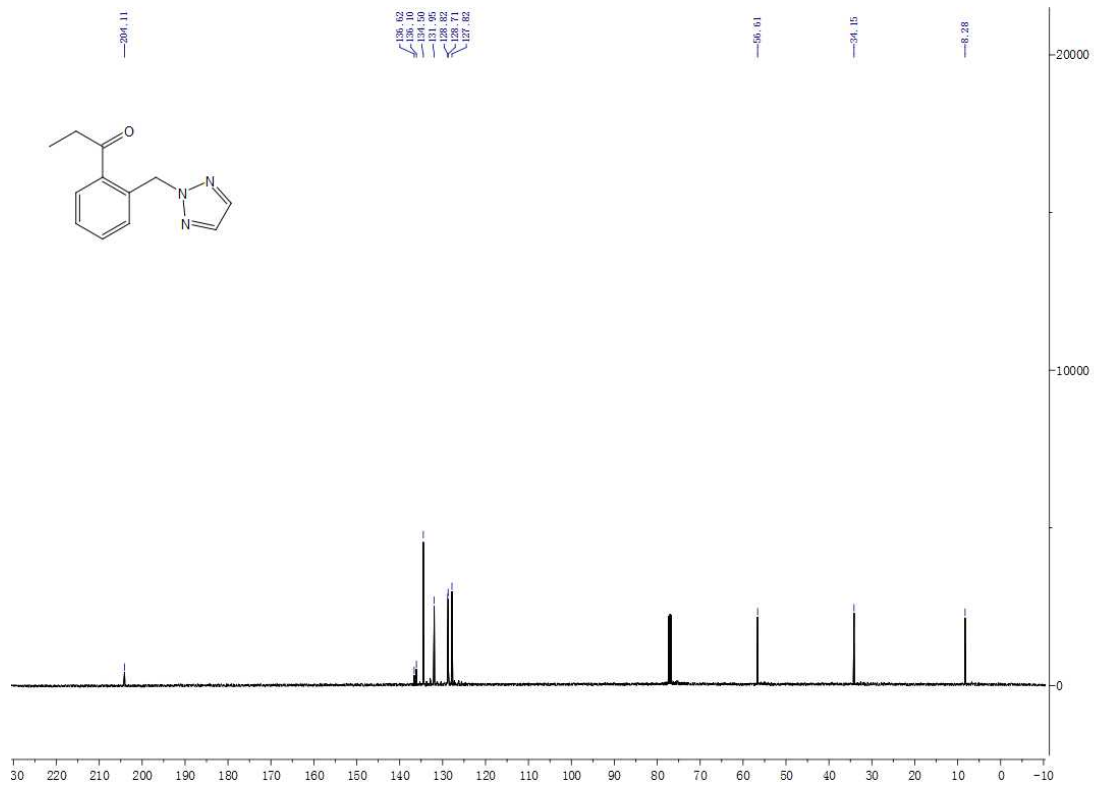

<sup>1</sup>H-4a







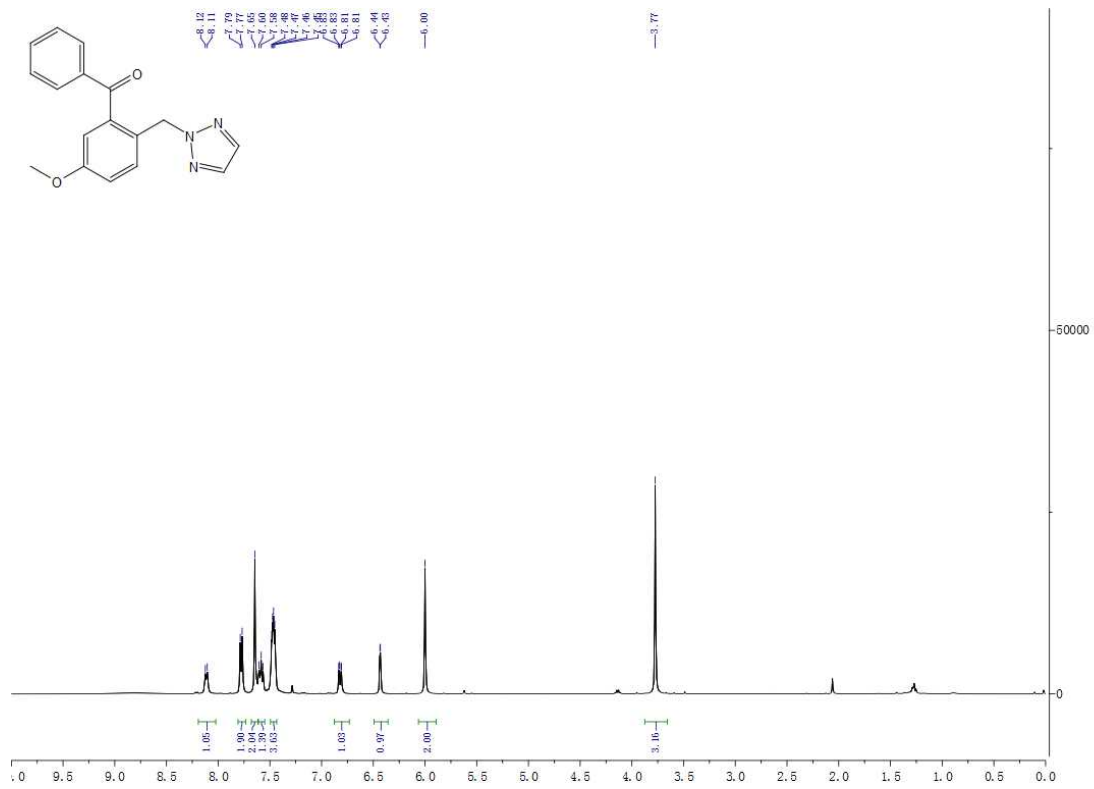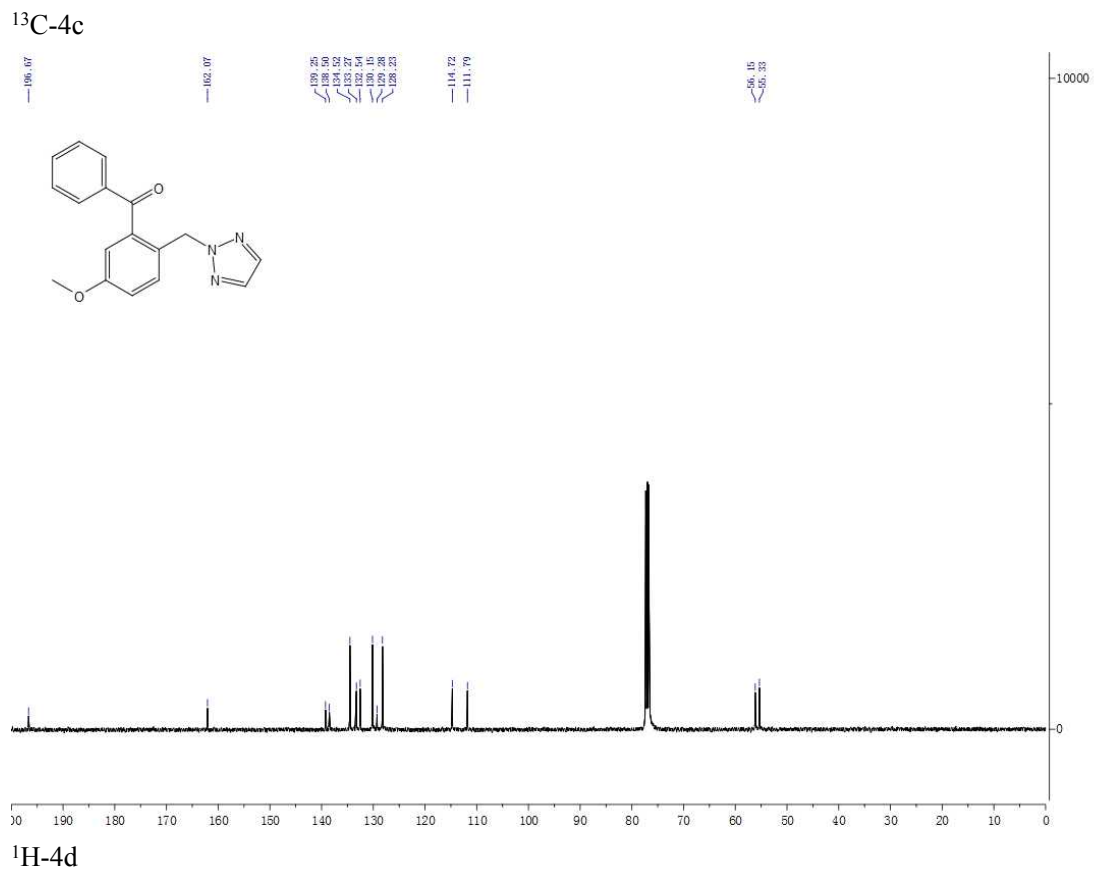

**<sup>1</sup>H-4d**

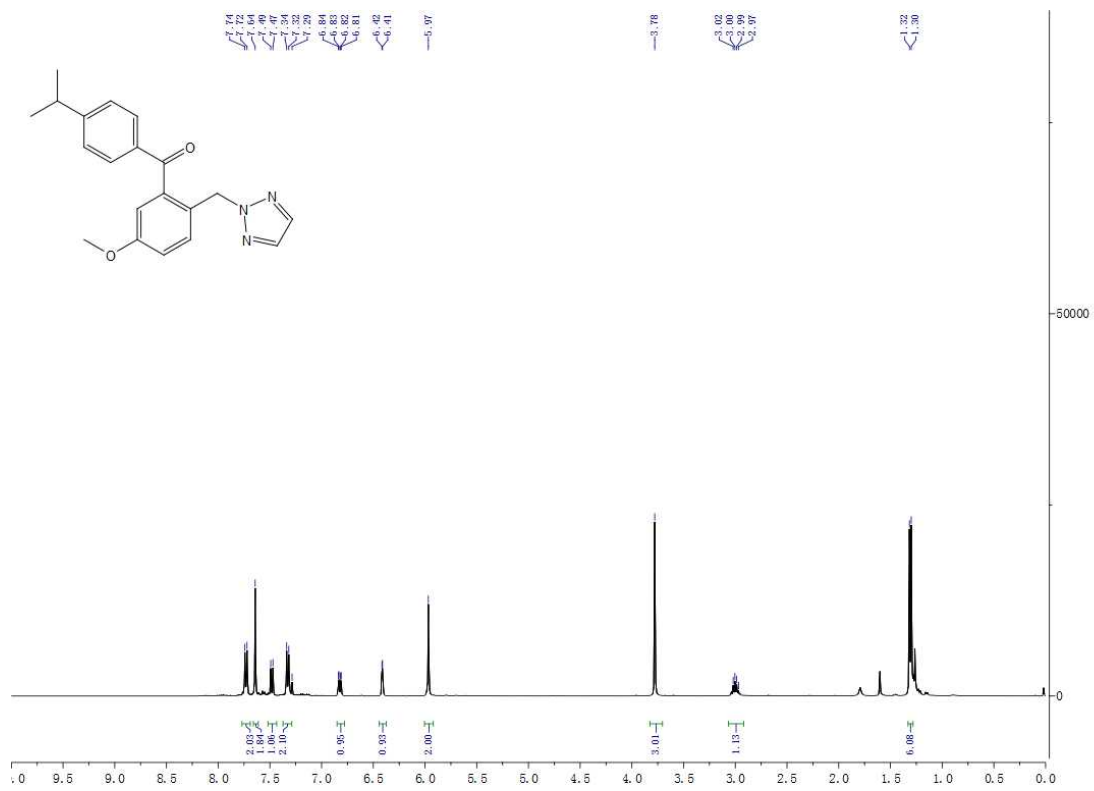

<sup>13</sup>C-4d

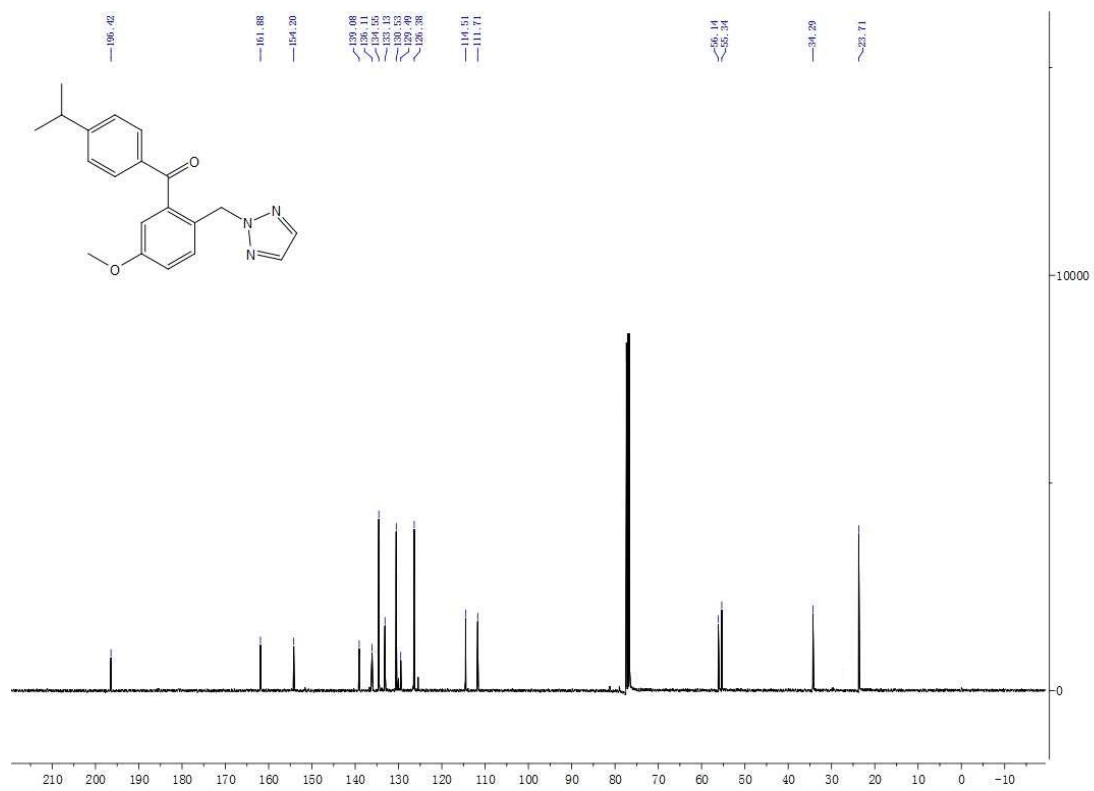

<sup>1</sup>H-4e

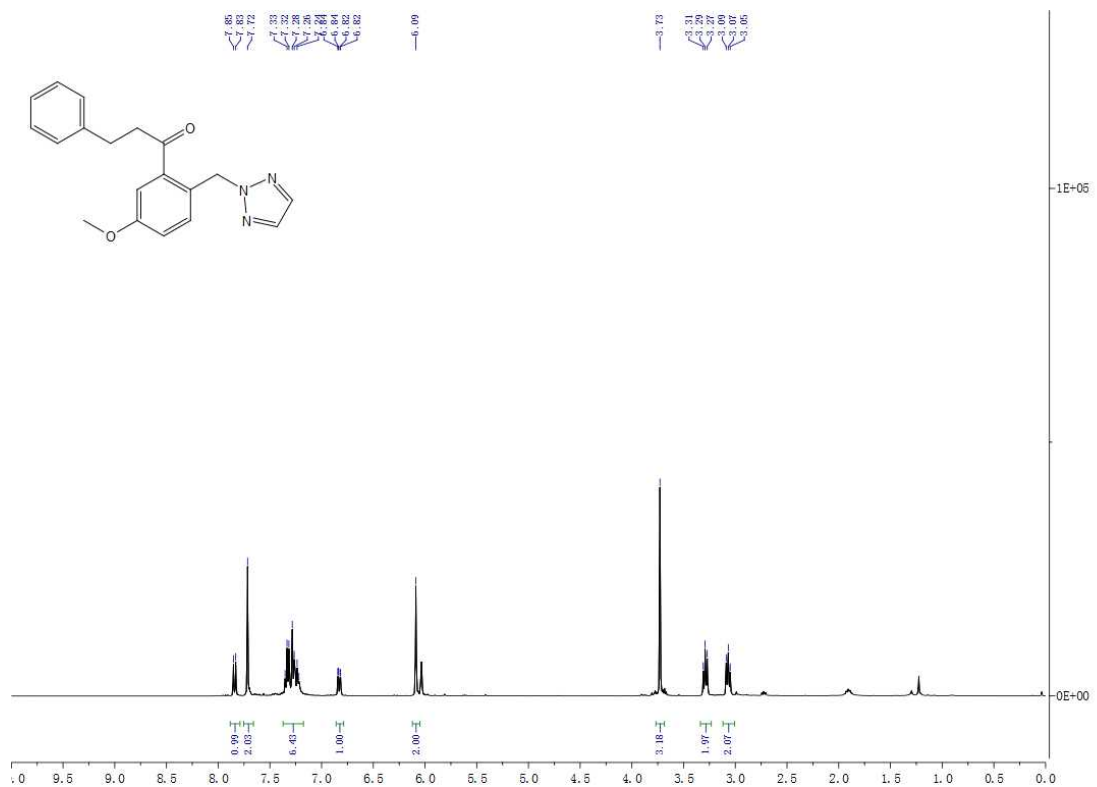

<sup>13</sup>C-4e

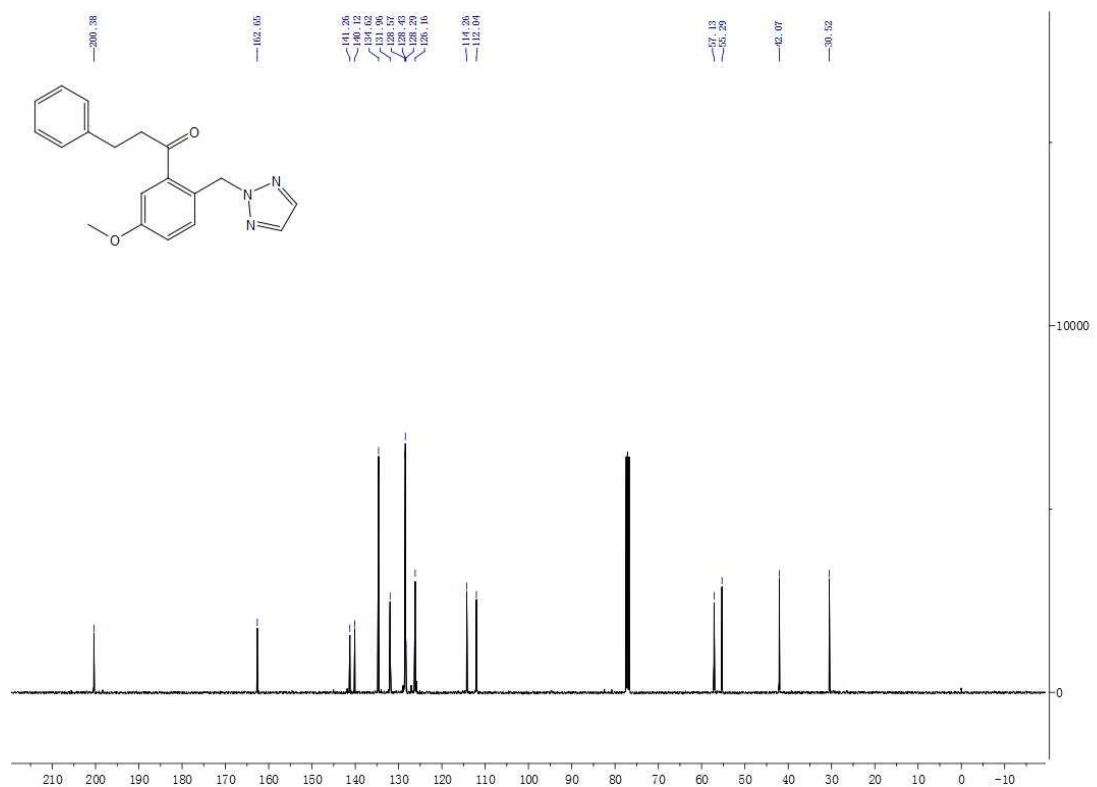

<sup>1</sup>H-4f

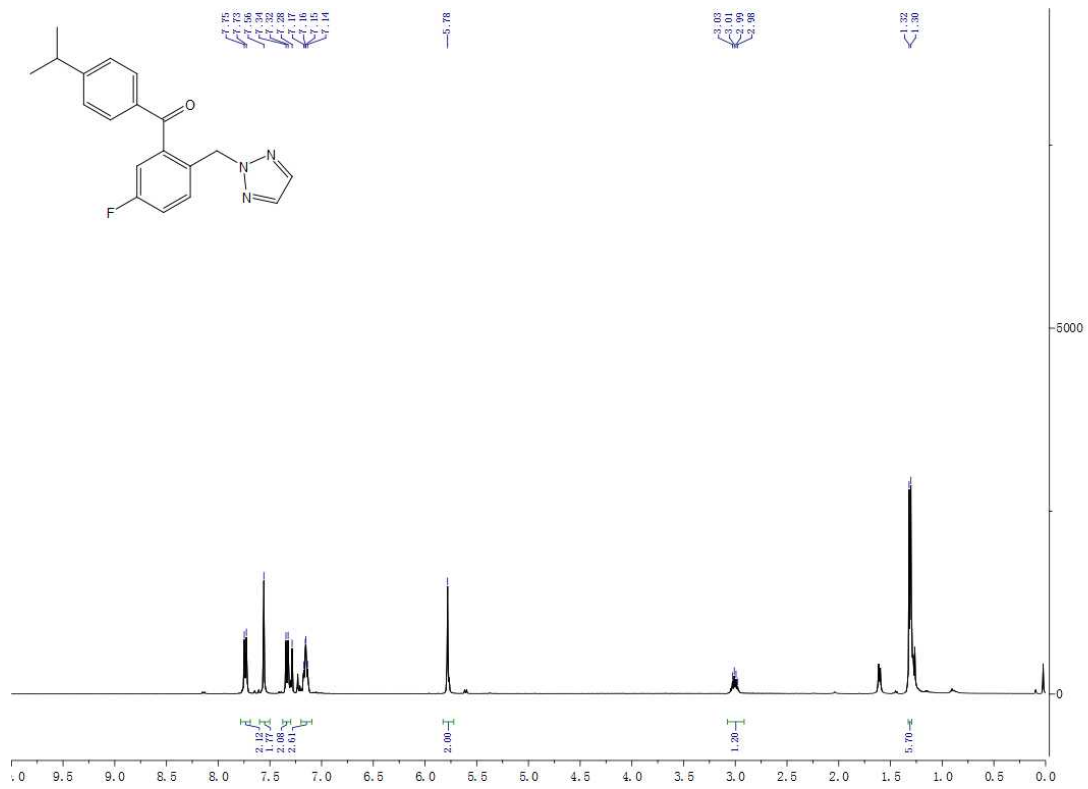

**<sup>13</sup>C-NMR**

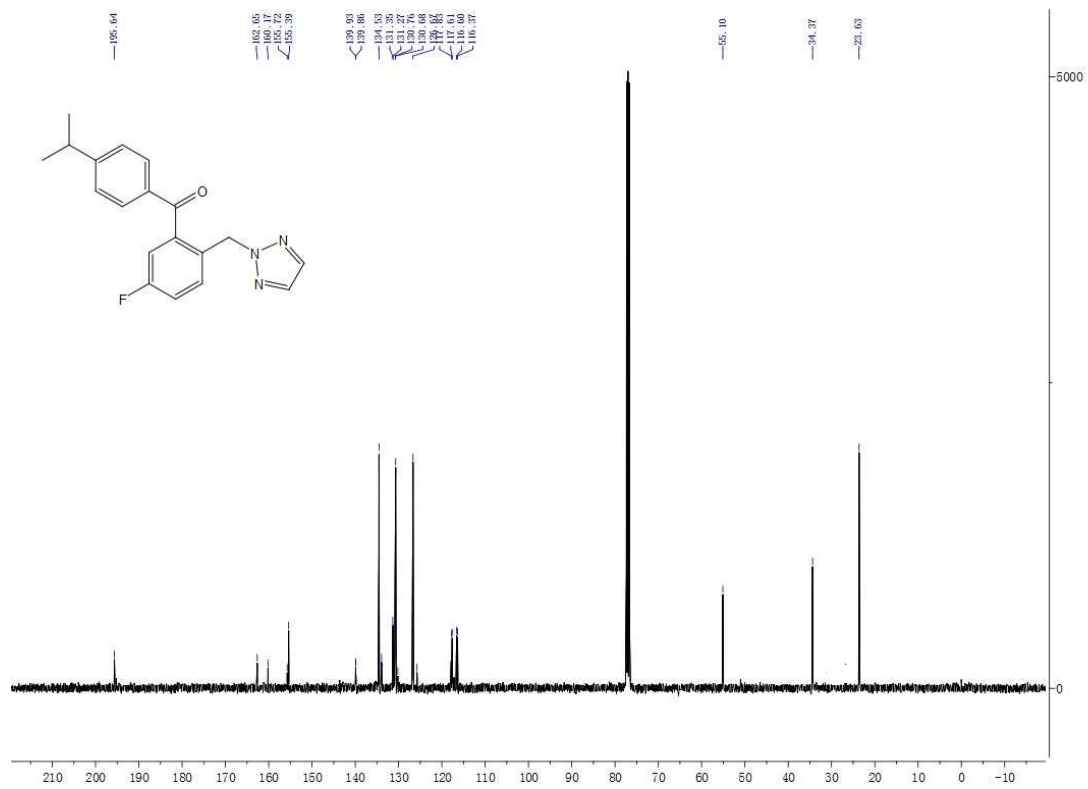

**<sup>1</sup>H-4g**

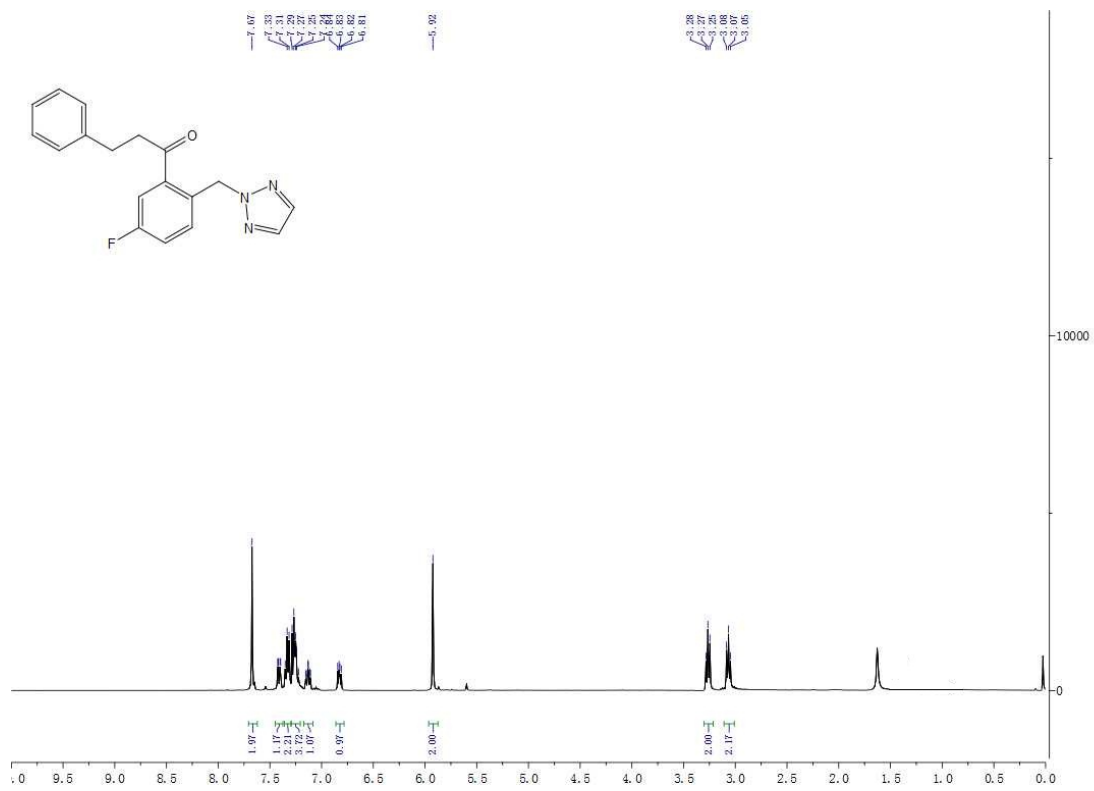

<sup>13</sup>C-4g

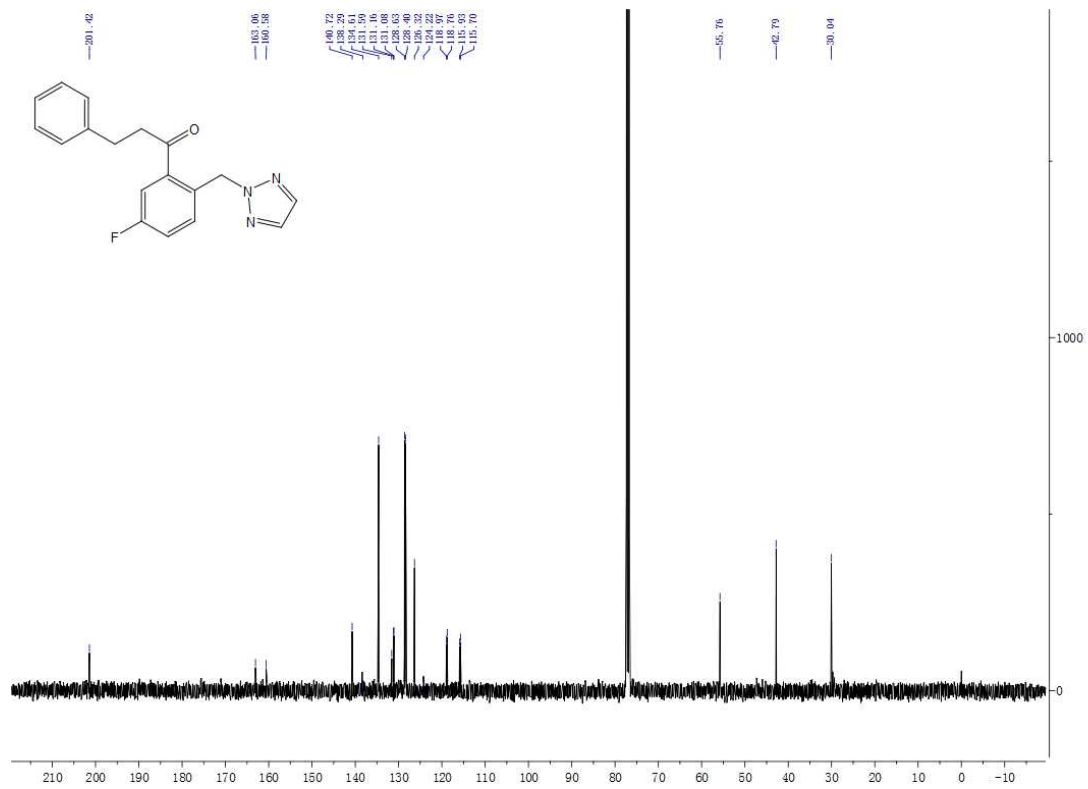

<sup>1</sup>H-4h

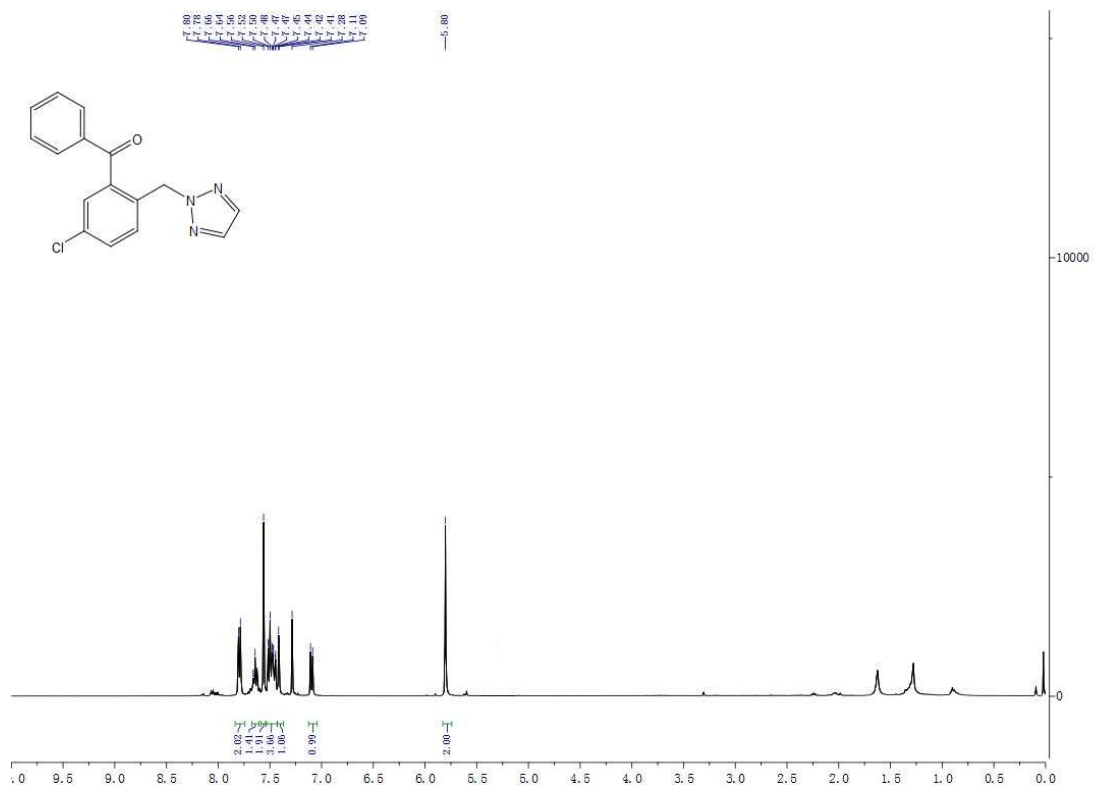

**<sup>13</sup>C-4h**

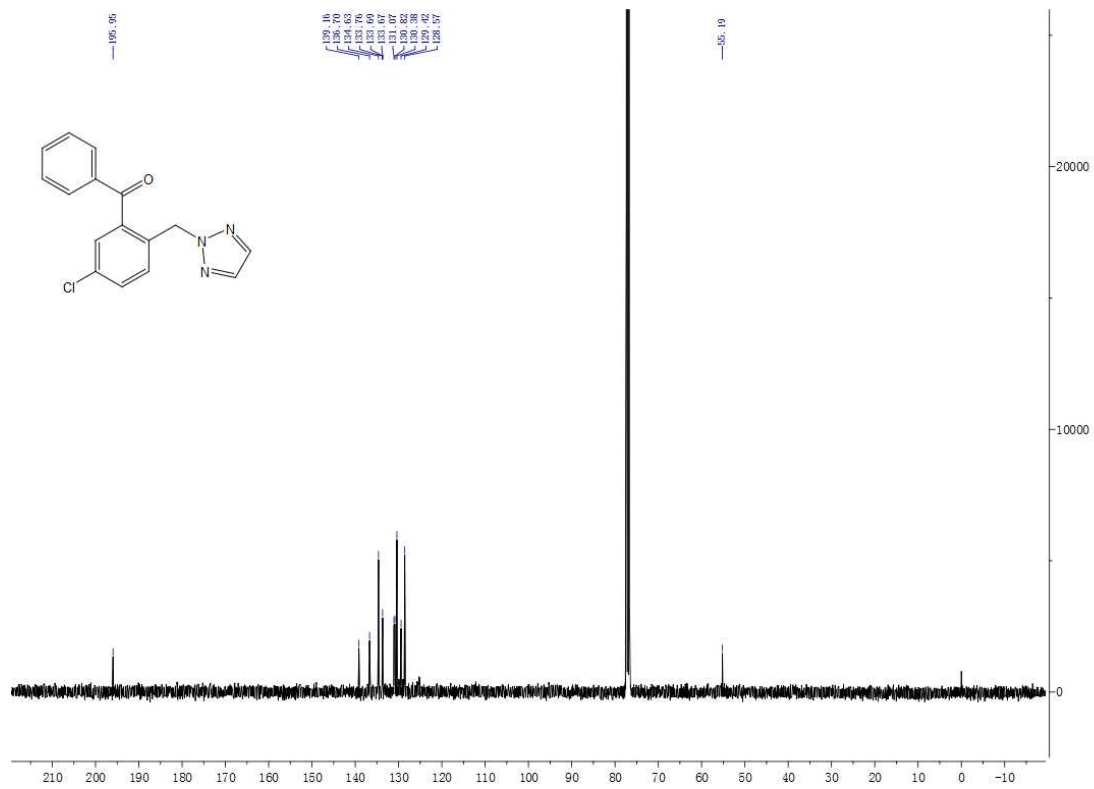

**<sup>1</sup>H-4i**

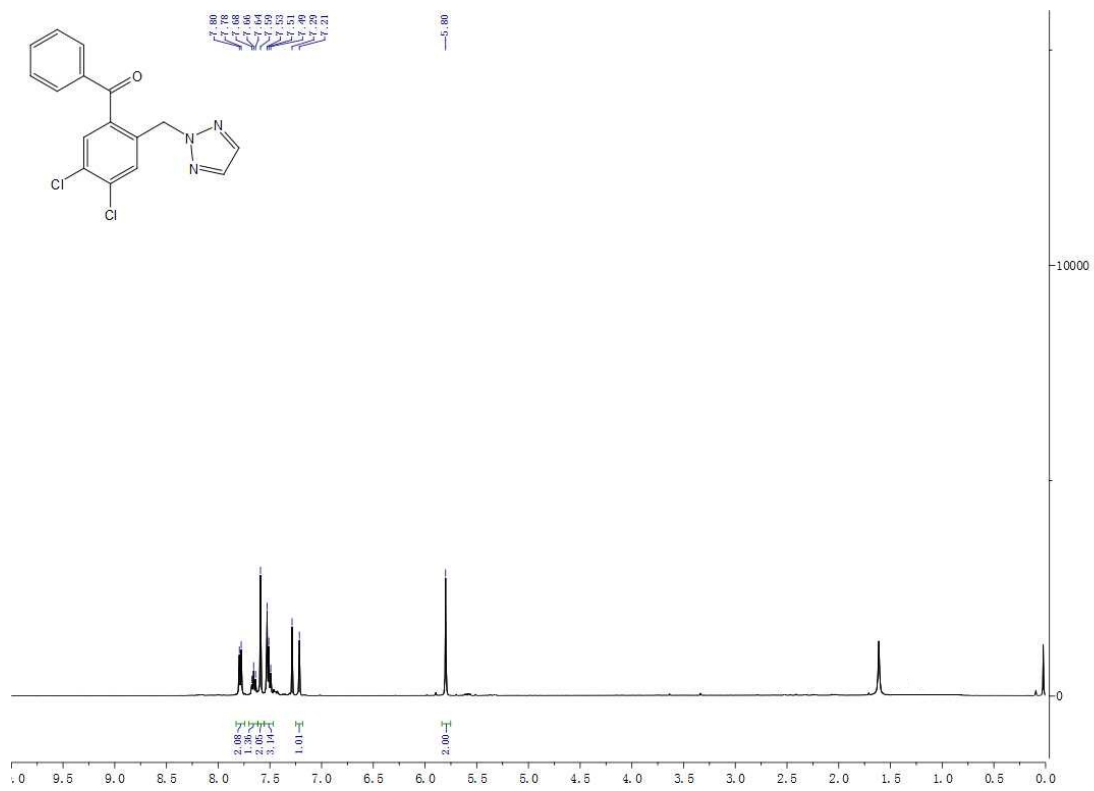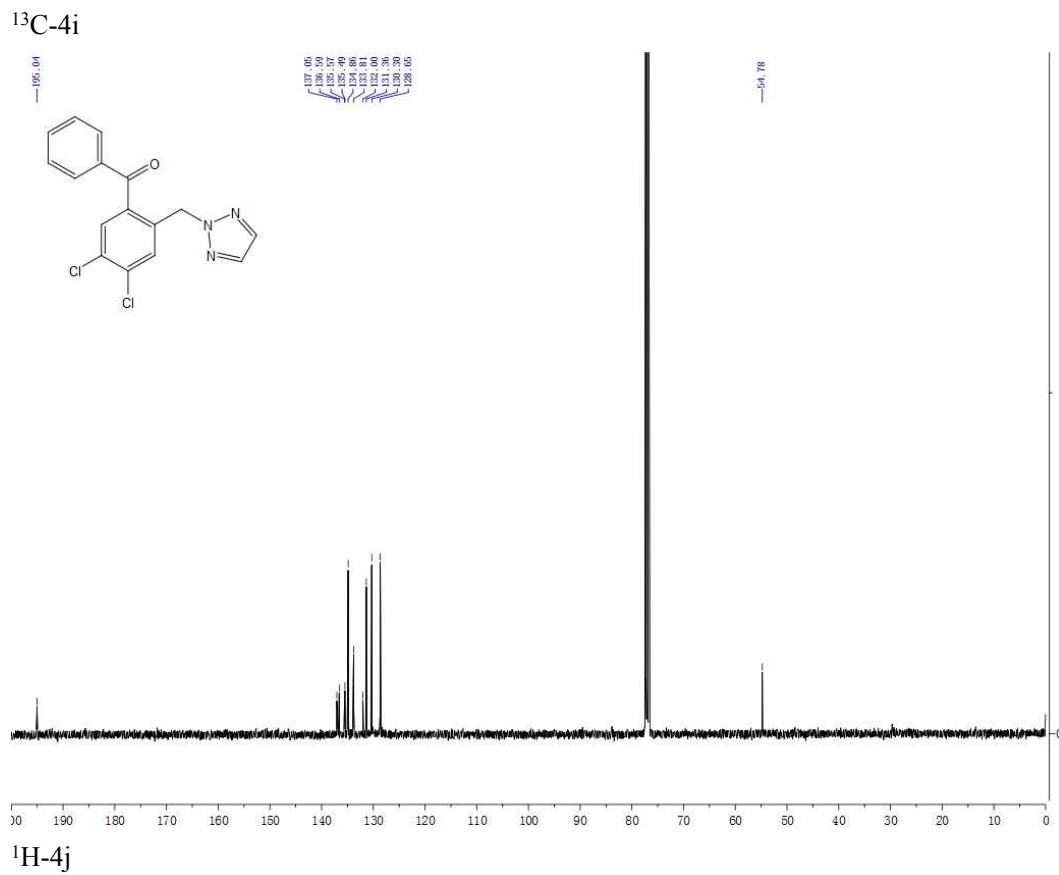

**<sup>1</sup>H-4j**



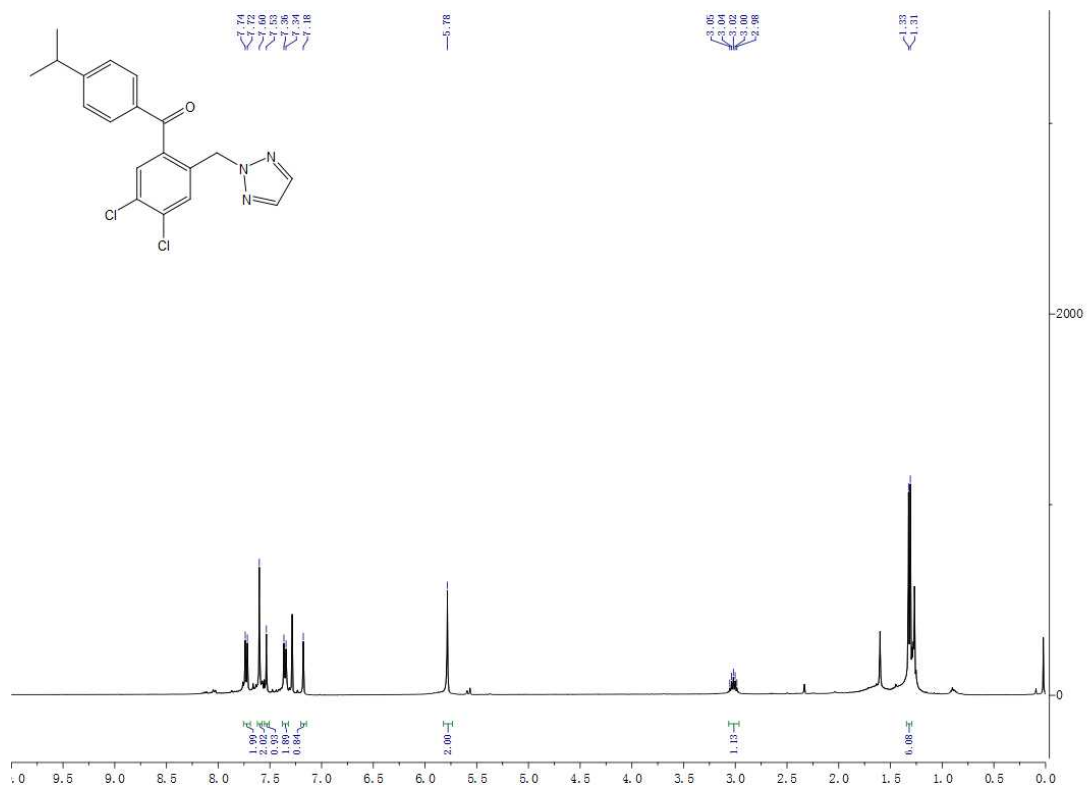

<sup>13</sup>C-4j

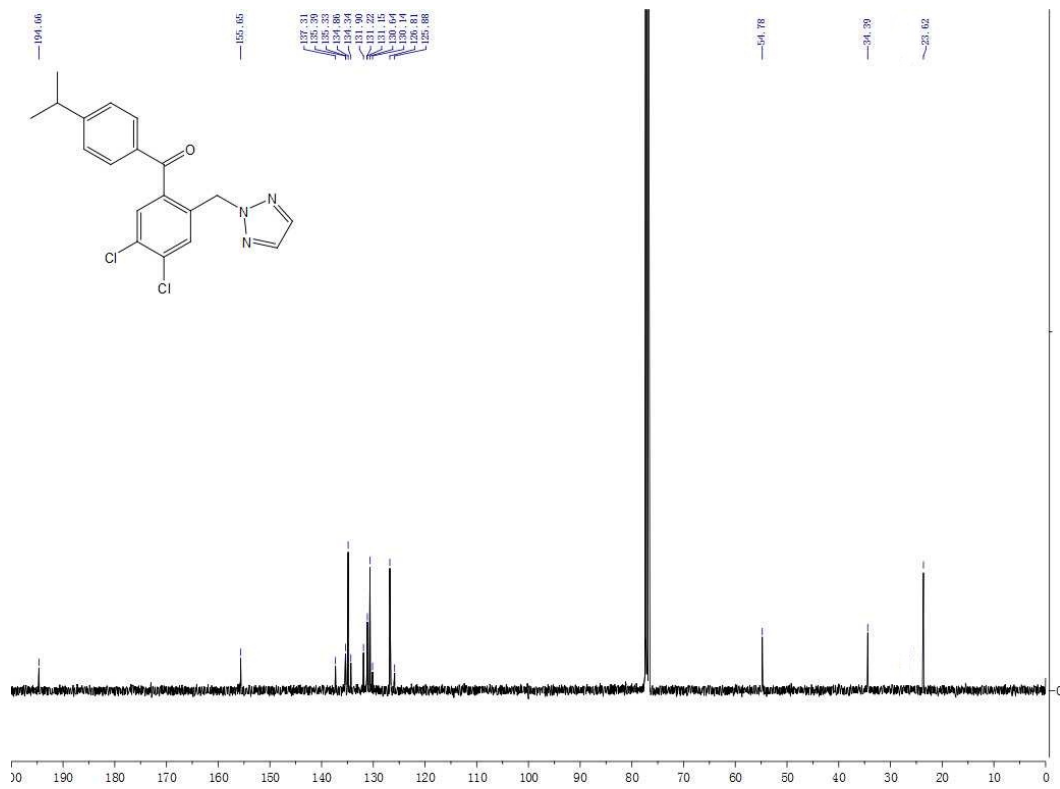

<sup>1</sup>H-4k

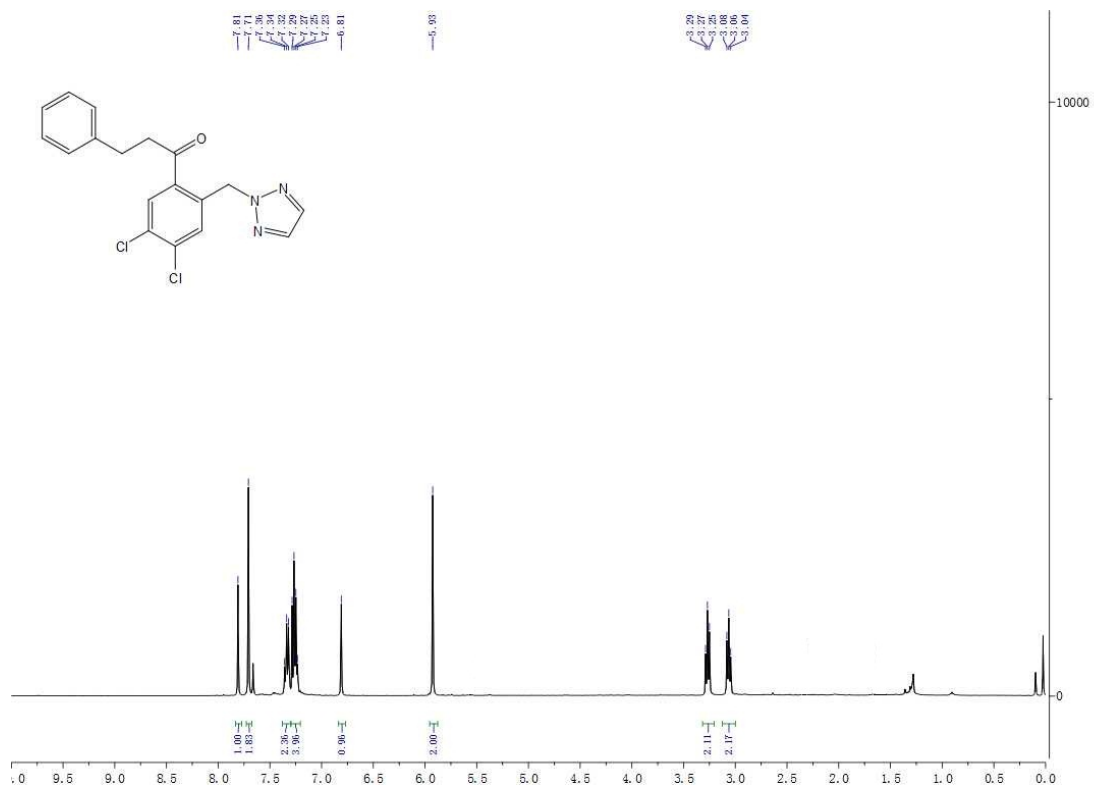

<sup>13</sup>C-4k

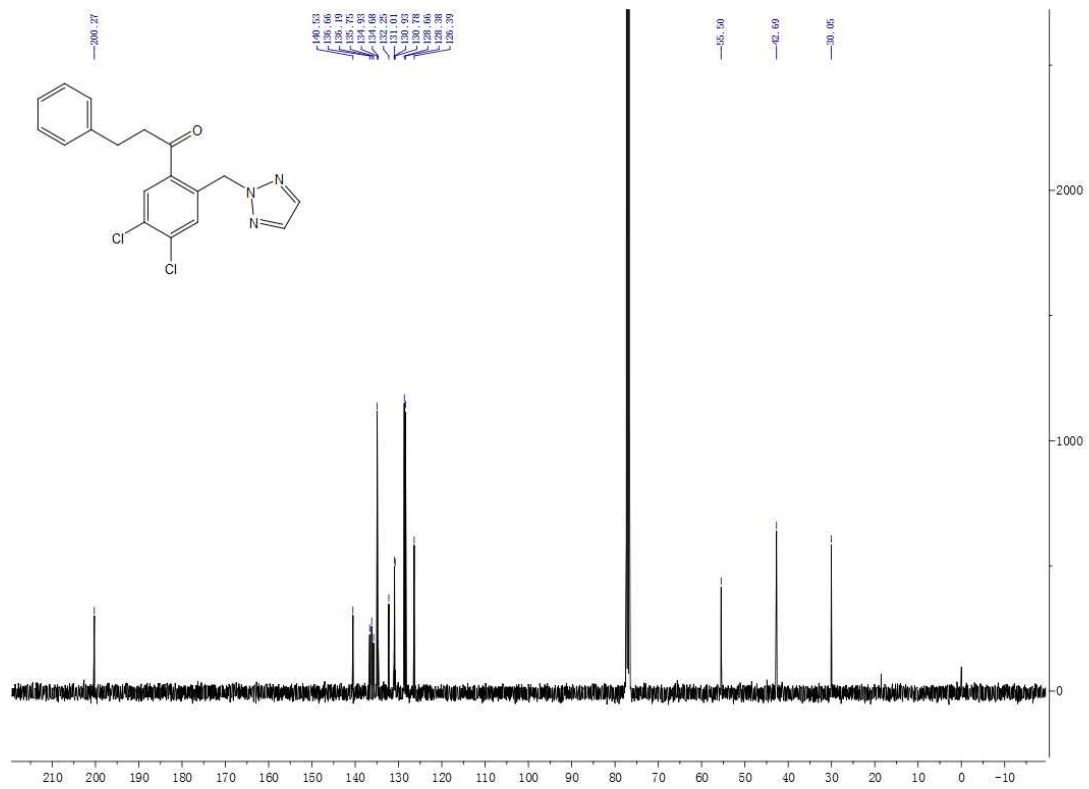

<sup>1</sup>H-4l

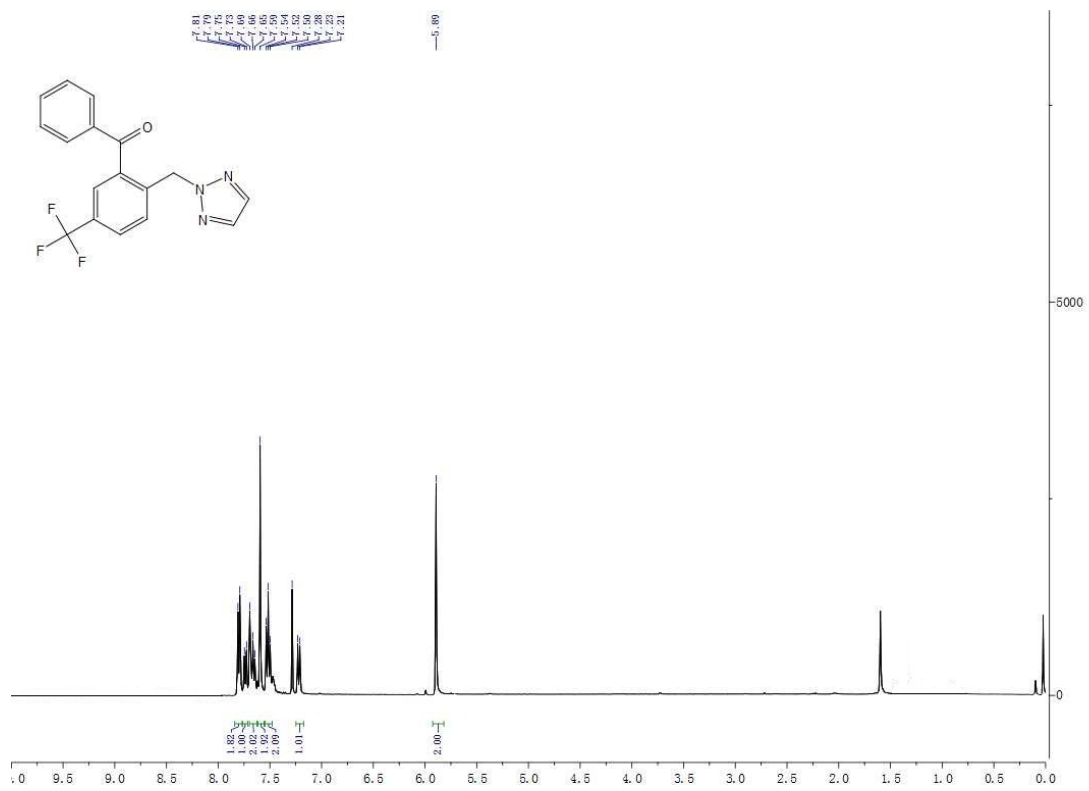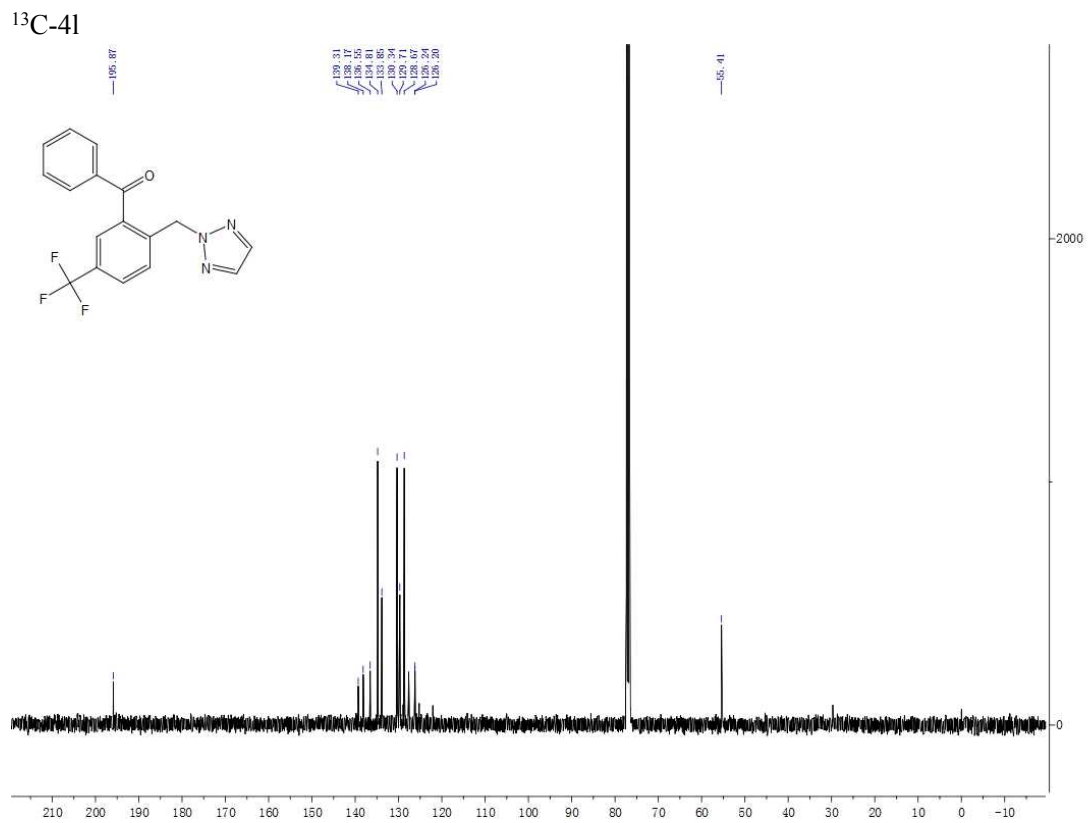

<sup>1</sup>H-4m

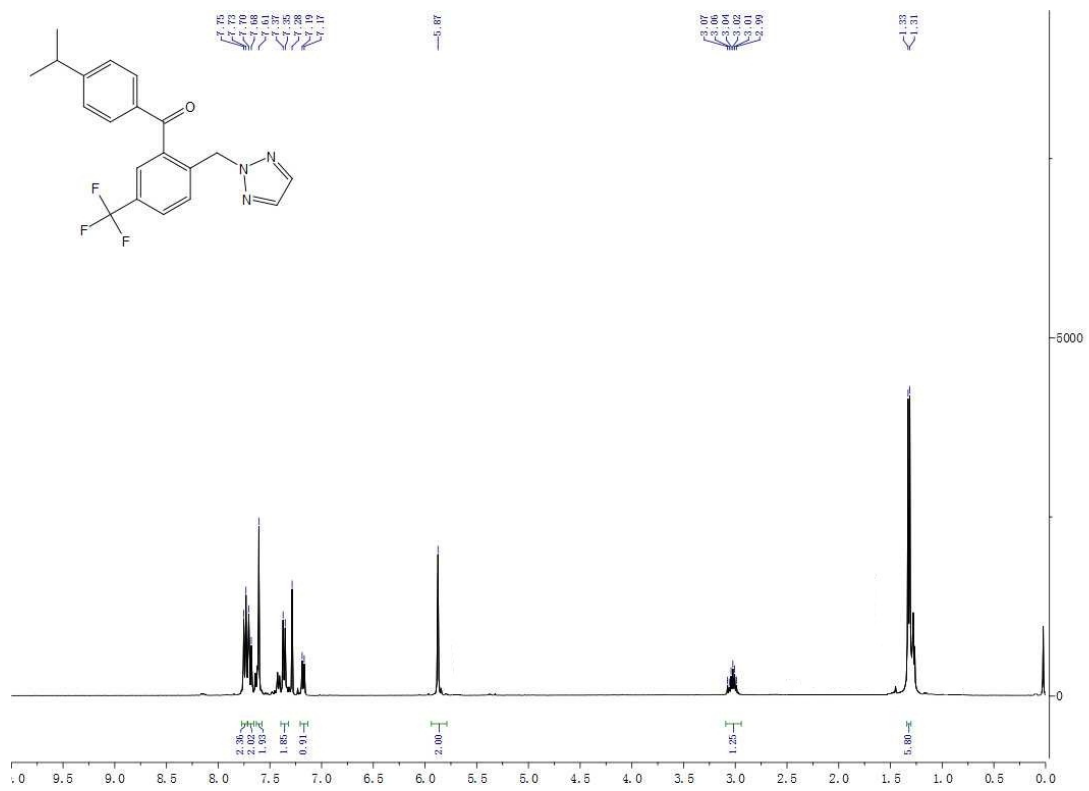

<sup>13</sup>C-4m

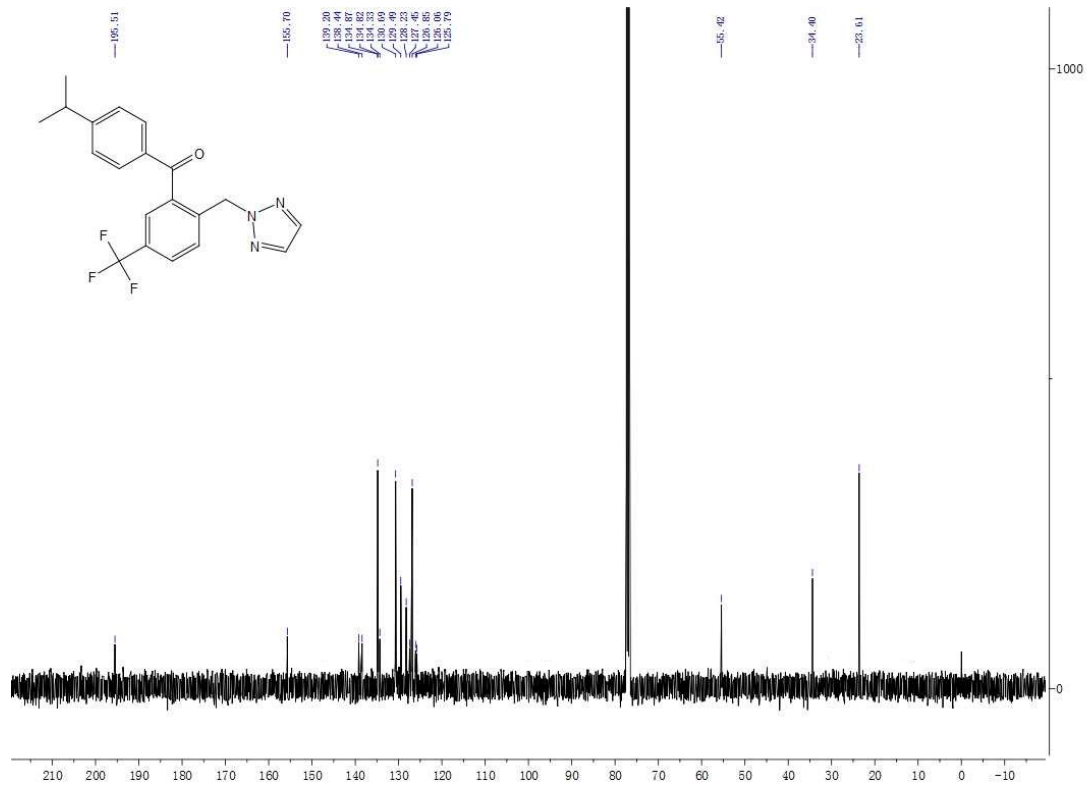

Supplement: c4ob01406e1.pdf [file c4ob01406e1.pdf]
